# Supplementary material
Source: ML conference proceedings conference paper supplement (https://openreview.net/forum?id=Dl4LetuLdyK)
Supplement: supplementary_material [file attachment]

## Sheet: dSprites (l=shape, p=color)
Unseen data shift			Results (Top 1 Accuracy):
Model	Algorithm	Seed:	1	2	3	4	5
ResNet18	ERM		0.779547	0.808193	0.778846	0.789363	0.808293
ResNet50	ERM		0.807091	0.80619	0.817208	0.776242	0.805689
ResNet101	ERM		0.798578	0.810497	0.819912	0.817608	0.813802
ViT	ERM		0.773838	0.776943	0.780649	0.779848	0.775841
MLP	ERM		0.776042	0.767528	0.772436	0.775641	0.785757
ResNet18	ERM+ImageNet Augm		1	1	0.9999	0.9998	0.9998
ResNet18	ERM+AugMix Augm		0.871494	0.882312	0.864283	0.923177	0.85026
ResNet18	ERM+RandAugment Augm		0.996294	0.99379	0.997496	0.998197	0.993189
ResNet18	ERM+AutoAugment Augm		0.943109	0.904547	0.935998	0.935797	0.943109
ResNet18	IRM		0.818209	0.816807	0.814103	0.817107	0.808594
ResNet18	CORAL		0.830529	0.838341	0.797877	0.819111	0.814103
ResNet18	MixUp		0.821915	0.816206	0.818109	0.813902	0.817608
ResNet18	SagNet		0.829026	0.813802	0.816707	0.817508	0.780749
ResNet18	DANN		0.848758	0.824419	0.839243	0.860477	0.823117
ResNet18	BN-Adapt		0.815705	0.814503	0.814904	0.809996	0.811398
ResNet18	JTT		0.841246	0.821114	0.813201	0.809595	0.811999
ResNet18	CycleGAN		0.833033	0.838642	0.840946	0.835337	0.871294
MLP	B-VAE		0.717248	0.722656	0.711939	0.73107	0.722456
ResNet18	PreTrained on ImageNet		0.999599	1	0.9999	0.9997	0.9997
Low data shift		N:	1					5					10					50					100					500					1000					5000					10000
Model	Algorithm	Seed:	1	2	3	4	5	1	2	3	4	5	1	2	3	4	5	1	2	3	4	5	1	2	3	4	5	1	2	3	4	5	1	2	3	4	5	1	2	3	4	5	1	2	3	4	5
ResNet18	ERM		0.781851	0.804988	0.809295	0.845252	0.79377	0.795873	0.86889	0.779748	0.796374	0.871895	0.794671	0.793169	0.793169	0.798578	0.802684	0.982071	0.997997	0.980369	0.983474	0.999199	0.788762	0.982272	0.999199	0.809295	0.792167	1	0.9999	1	1	1	1	1	1	1	1	1	1	1	1	0.9998	1	0.9998	1	1	1
ResNet50	ERM		0.810998	0.829427	0.806791	0.901943	0.866386	0.98147	0.998297	0.998097	0.886518	0.889223	0.813502	0.999599	0.845152	0.9999	0.96264	0.995092	0.882111	0.8126	0.886318	0.963241	0.9998	1	0.99379	0.994892	0.9999	0.9999	1	1	0.9998	1	0.9998	0.9999	0.9999	0.9998	0.999499	1	1	0.9999	1	0.9999	1	0.9999	0.9997	0.9999	0.9998
ResNet101	ERM		0.811298	0.807492	0.808594	0.810296	0.883714	0.974459	0.839643	0.989784	0.869591	0.991587	0.854968	0.816707	0.986378	0.998898	0.933794	0.9997	0.883313	0.825921	0.876102	0.865385	0.9999	0.996995	0.907352	1	0.909355	0.999599	0.9999	0.9999	0.999499	0.9999	1	0.9998	0.9999	1	0.9999	0.9999	1	1	1	1	0.9999	1	1	1	1
ViT	ERM		0.791066	0.801983	0.782752	0.800581	0.796174	0.791567	0.80649	0.805489	0.779948	0.801783	0.816607	0.800681	0.789764	0.803285	0.79367	0.805689	0.811999	0.808293	0.802484	0.802083	0.810397	0.816506	0.808193	0.809696	0.803385	0.838241	0.829127	0.815004	0.825821	0.829627	0.863181	0.859275	0.864283	0.901943	0.863281	0.992388	0.992388	0.992188	0.991286	0.992188	0.999499	0.998698	0.998297	0.998898	0.998397
MLP	ERM		0.781751	0.785357	0.774239	0.782552	0.783253	0.785357	0.786659	0.783954	0.798277	0.798978	0.779748	0.794471	0.786659	0.797476	0.78095	0.788762	0.80018	0.795873	0.789463	0.794671	0.803285	0.793069	0.797376	0.79988	0.789764	0.805489	0.810296	0.801482	0.810397	0.810797	0.815004	0.811298	0.814603	0.810196	0.810296	0.88772	0.891226	0.890124	0.887019	0.882512	0.97506	0.966847	0.954427	0.953726	0.960036
ResNet18	ERM+ImageNet Augm		0.996895	0.991086	0.990885	0.9998	0.995593	0.998898	0.999599	0.998197	0.996795	0.998698	0.997796	0.998598	0.998297	0.998297	0.997897	0.999399	0.999499	0.999599	0.998097	0.999199	0.995793	0.995593	0.997696	0.998598	0.999099	0.998397	0.999099	0.998898	0.997596	0.998598	0.997596	0.998998	0.9999	0.998698	0.997796	0.998898	0.997396	0.998898	0.998498	0.999599	0.999299	0.998898	0.998297	0.9997	0.999399
ResNet18	ERM+AugMix Augm		0.811298	0.84976	0.784555	0.841647	0.801583	0.794671	0.82512	0.819511	0.820012	0.789163	0.810296	0.808494	0.801182	0.854167	0.809595	0.816506	0.796474	0.788161	0.786959	0.82512	0.908854	0.78736	0.788261	0.786458	0.784655	0.957232	0.811999	0.970553	0.963642	0.800881	0.998197	0.994191	0.983173	0.986979	0.991186	1	0.999299	0.999599	0.998798	0.998798	0.999299	0.998998	0.999599	0.998698	0.999299
ResNet18	ERM+RandAugment Augm		0.915865	0.919872	0.954828	0.888221	0.969651	0.882712	0.966647	0.915665	0.91867	0.939603	0.871795	0.88722	0.94351	0.882612	0.94351	0.980869	0.842748	0.983674	0.862881	0.975861	0.797576	0.98117	0.823718	0.846655	0.799179	0.878405	0.91266	0.852264	0.826623	0.930589	0.810497	0.859575	0.938802	0.991186	0.795873	0.995092	0.994591	0.998898	0.993089	0.997496	0.997897	0.997897	0.996695	0.999299	0.993189
ResNet18	ERM+AutoAugment Augm		0.890325	0.909856	0.918069	0.942007	0.890725	0.903245	0.932792	0.902244	0.904046	0.90635	0.920272	0.941907	0.909856	0.947516	0.939203	0.892528	0.904046	0.90655	0.934095	0.91246	0.992989	0.886719	0.858273	0.851963	0.857472	0.865685	0.991687	0.819912	0.851462	0.844151	0.969752	0.920773	0.933994	0.939002	0.931991	0.9999	0.999599	1	0.999299	0.999599	0.9999	0.9997	0.999399	0.9999	0.9998
ResNet18	IRM		0.936398	0.877704	0.99349	0.983674	0.977965	0.999399	0.9997	0.983674	0.9997	0.997095	0.999199	0.999499	0.979968	0.995092	1	0.999399	1	0.999599	1	0.9999	0.9997	0.9998	1	1	1	0.9999	1	1	1	0.9998	1	1	0.999599	0.999599	1	1	1	1	0.999599	1	1	0.9999	1	1	1
ResNet18	CORAL		0.941807	0.932993	0.951022	0.951923	0.988882	0.984375	0.999199	0.974459	0.998297	0.96875	0.948818	0.953626	0.904547	0.96845	0.957332	0.985477	0.995393	0.999499	0.981871	1	0.997796	0.998397	0.999299	1	1	1	1	1	1	1	1	0.9999	1	0.9998	0.9999	1	1	1	1	1	1	1	1	1	1
ResNet18	MixUp		0.972356	0.963642	0.931991	0.973458	0.866486	0.9997	0.94391	0.957532	0.984175	0.999099	0.998698	0.999499	0.969251	0.986879	0.998297	0.9999	0.9998	0.9998	1	0.9998	0.9998	0.9998	1	0.9998	0.999499	0.9999	1	1	1	1	1	0.9999	1	0.9999	1	1	1	1	1	1	0.9999	1	0.9998	1	0.9999
ResNet18	SagNet		0.777945	0.79367	0.768429	0.837139	0.982772	0.821414	0.833534	0.804487	0.850561	0.816306	0.820012	0.798478	0.784655	0.896234	0.8127	0.807192	0.94361	0.805288	0.801883	0.936398	0.9998	0.9999	0.815004	0.998898	0.922376	0.9997	0.9998	0.9997	1	0.9998	0.9997	0.9999	0.9997	0.999599	0.999099	1	0.9998	0.999299	0.999599	0.999499	0.9997	1	0.9998	0.9997	0.9999
ResNet18	DANN		0.998698	0.997997	0.988882	0.982372	0.994892	0.992788	0.999299	0.999199	0.995693	0.9998	0.997596	0.999099	0.9997	1	0.999399	0.9998	0.9999	1	1	0.9999	0.999399	1	0.9997	1	1	0.9997	0.9999	1	0.9999	0.9999	1	0.9999	1	1	1	1	0.9998	0.9999	1	1	1	1	1	1	1
ResNet18	BN-Adapt		0.830128	0.899139	0.933494	0.978666	0.934696	0.944411	0.96264	0.88141	0.955929	0.988882	0.935697	0.986378	0.999099	0.995994	0.995192	1	1	0.9999	0.998498	0.999399	0.9998	0.9999	0.9999	0.999199	0.999099	1	0.9999	1	1	1	1	0.9999	1	1	0.9998	1	1	1	0.9999	1	0.9999	1	1	1	0.9999
ResNet18	JTT		0.978966	0.819912	0.84355	0.939303	0.845252	0.959535	0.970853	0.931891	0.964944	0.882212	0.987881	0.991687	0.999299	0.99379	0.998798	0.992488	0.999499	1	1	0.999299	0.9997	1	1	0.9999	0.985978	0.999499	0.9999	1	1	0.9998	1	0.9999	1	0.9999	0.999599	0.9997	0.9998	0.9999	1	0.9997	1	1	1	0.9998	1
ResNet18	CycleGAN		0.952524	0.900641	0.958233	0.834535	0.865284	0.9998	1	0.991987	0.998998	0.997796	0.9997	1	0.9998	0.9998	0.9999	0.9999	1	1	0.9998	1	0.9998	0.9999	0.9997	1	1	1	1	0.9998	0.9999	0.9999	0.9997	1	0.999599	0.9998	0.9999	0.9999	0.9999	1	1	0.9999	0.999599	0.9999	0.9998	0.9997	0.9998
MLP	B-VAE		0.798678	0.78776	0.79998	0.789163	0.798377	0.798478	0.804788	0.802384	0.802784	0.802784	0.800481	0.802183	0.797075	0.814603	0.79367	0.804788	0.788862	0.80018	0.804587	0.797676	0.797075	0.802684	0.804788	0.809095	0.804988	0.820413	0.834736	0.834235	0.827925	0.833834	0.860076	0.864383	0.863882	0.877404	0.859375	0.982071	0.963942	0.976462	0.964643	0.971955	0.988381	0.98758	0.986979	0.983474	0.986078
ResNet18	PreTrained on ImageNet		0.999599	0.998998	0.9997	0.9998	0.999499	1	0.9998	1	0.999599	1	0.9998	0.9997	0.9999	0.9999	0.9999	0.9999	1	0.9998	0.9998	1	1	1	1	0.9999	1	0.9999	1	1	1	0.9999	1	1	0.9999	0.9999	1	1	0.9998	1	1	0.9999	0.9998	1	1	1	0.9999
Spurious correlation		N:	1					5					10					50					100					500					1000					5000					10000
Model	Algorithm	Seed:	1	2	3	4	5	1	2	3	4	5	1	2	3	4	5	1	2	3	4	5	1	2	3	4	5	1	2	3	4	5	1	2	3	4	5	1	2	3	4	5	1	2	3	4	5
ResNet18	ERM		0.330329	0.338041	0.340745	0.33734	0.326623	0.326623	0.334736	0.343249	0.331731	0.327825	0.332131	0.339343	0.336238	0.331731	0.32522	0.347957	0.337139	0.348057	0.339543	0.340946	0.366386	0.340044	0.333634	0.351963	0.339543	0.667067	0.565905	0.678586	0.647937	0.619491	0.958534	0.838742	1	0.996494	0.946915	0.9998	1	0.9999	1	1	1	1	1	1	1
ResNet50	ERM		0.348458	0.34395	0.332833	0.33734	0.370994	0.331731	0.341647	0.354567	0.338942	0.336639	0.339443	0.332432	0.34365	0.332332	0.331831	0.335337	0.333934	0.342849	0.35016	0.337139	0.33744	0.346554	0.332732	0.353766	0.340946	0.923377	0.590645	0.690304	0.801983	0.593249	0.9998	0.997796	0.998998	0.999299	0.9998	0.9999	0.9999	1	1	1	0.999599	1	0.9999	1	0.9998
ResNet101	ERM		0.332232	0.336839	0.341146	0.332131	0.35637	0.345353	0.354367	0.348157	0.333233	0.334435	0.333133	0.340946	0.340144	0.342748	0.342047	0.348458	0.333734	0.341146	0.329728	0.336438	0.339243	0.372897	0.344451	0.352063	0.334135	0.876202	0.988381	0.899339	0.794571	0.676583	0.999299	1	0.999099	0.998197	0.9997	1	1	0.9999	0.9999	0.9999	0.9999	0.9998	1	1	1
ViT	ERM		0.332532	0.334135	0.339143	0.337139	0.333834	0.334635	0.332332	0.339042	0.327624	0.327925	0.333534	0.339143	0.338041	0.330629	0.327524	0.338942	0.332933	0.329828	0.333834	0.339042	0.335337	0.331931	0.339243	0.351863	0.329427	0.348157	0.367889	0.357171	0.373498	0.33734	0.397336	0.381911	0.389924	0.416867	0.405248	0.788462	0.800581	0.820312	0.795974	0.810196	0.946314	0.940805	0.941907	0.95012	0.964944
MLP	ERM		0.339443	0.337841	0.330228	0.332332	0.33113	0.338141	0.329026	0.330429	0.331631	0.322516	0.337841	0.334435	0.334535	0.34355	0.332332	0.341446	0.341847	0.345252	0.344952	0.332833	0.341146	0.341747	0.33734	0.352163	0.335837	0.341647	0.355869	0.355569	0.350561	0.353165	0.355669	0.371995	0.373998	0.359776	0.374199	0.498698	0.608974	0.503906	0.569411	0.54397	0.664463	0.65635	0.643329	0.645833	0.641526
ResNet18	ERM+ImageNet Augm		0.696214	0.734976	0.61268	0.685296	0.657853	0.581731	0.729768	0.695413	0.734575	0.597356	0.667668	0.67528	0.684996	0.711939	0.713241	0.739784	0.703225	0.736579	0.789764	0.761919	0.782352	0.742488	0.827324	0.685497	0.687099	0.865685	0.871294	0.858373	0.864984	0.883413	0.89974	0.894631	0.926182	0.9372	0.914563	0.968149	0.979968	0.975962	0.975661	0.98728	0.995994	0.983373	0.988281	0.986779	0.989784
ResNet18	ERM+AugMix Augm		0.333333	0.33113	0.329227	0.353265	0.342849	0.333233	0.345954	0.334936	0.331631	0.333133	0.340345	0.330529	0.342548	0.339543	0.323818	0.339844	0.333333	0.333433	0.330629	0.333433	0.333934	0.344451	0.336338	0.329527	0.33744	0.335136	0.351262	0.351362	0.356871	0.338141	0.409355	0.405749	0.394732	0.423377	0.38772	0.940405	0.972256	0.928586	0.955028	0.900341	0.976963	0.983774	0.985777	0.980268	0.971254
ResNet18	ERM+RandAugment Augm		0.357372	0.329928	0.326723	0.357672	0.359375	0.338341	0.350561	0.33744	0.337139	0.338742	0.334635	0.35026	0.32492	0.346554	0.339042	0.335938	0.323017	0.331931	0.335537	0.333333	0.333333	0.333834	0.335537	0.334836	0.337139	0.342047	0.345553	0.331631	0.334836	0.347957	0.351062	0.344651	0.359075	0.349259	0.351462	0.534255	0.784455	0.720052	0.657652	0.489784	0.951122	0.908554	0.923778	0.914964	0.928185
ResNet18	ERM+AutoAugment Augm		0.339143	0.333133	0.364483	0.327624	0.335837	0.340545	0.330228	0.334535	0.357372	0.336839	0.327224	0.336138	0.339143	0.335136	0.329627	0.331931	0.339243	0.341847	0.33744	0.336038	0.324319	0.335136	0.336238	0.342548	0.329026	0.341046	0.344752	0.342248	0.338141	0.339443	0.348357	0.409856	0.360176	0.485777	0.35026	0.945112	0.873598	0.816907	0.942308	0.787961	0.989784	0.985677	0.985377	0.984075	0.979667
ResNet18	IRM		0.348658	0.346454	0.329127	0.3753	0.372696	0.331831	0.351462	0.36258	0.352264	0.360978	0.332732	0.357772	0.367488	0.345753	0.350861	0.372997	0.357973	0.358574	0.363982	0.338642	0.372796	0.363782	0.377804	0.375501	0.354167	0.88101	0.844151	0.989483	0.765224	0.953225	0.994892	1	0.999399	1	0.998898	1	0.9999	1	1	0.9997	1	1	0.9999	1	1
ResNet18	CORAL		0.336839	0.344852	0.354467	0.35617	0.361779	0.34375	0.341246	0.371494	0.365184	0.357572	0.359675	0.360477	0.374299	0.391026	0.363381	0.372997	0.361779	0.366687	0.366286	0.380809	0.375701	0.371895	0.388021	0.376903	0.371795	0.77474	0.951122	0.975761	0.947716	0.864283	0.999399	0.9997	0.999599	0.999599	0.9997	1	0.9999	0.9999	1	0.9999	0.9999	0.999599	1	0.999599	1
ResNet18	MixUp		0.33113	0.344351	0.36268	0.363381	0.361078	0.339343	0.341647	0.363081	0.333433	0.340545	0.338341	0.338341	0.342448	0.347356	0.35026	0.345052	0.350461	0.354968	0.35607	0.348357	0.349058	0.360276	0.380008	0.361378	0.375701	0.994491	0.692007	0.83774	0.996394	0.962841	0.999599	0.999599	0.9998	0.996695	0.999499	0.9998	0.999599	1	0.9998	1	0.9999	1	0.999399	0.9999	0.9999
ResNet18	SagNet		0.347656	0.345353	0.357272	0.350861	0.361178	0.351863	0.347756	0.397436	0.376202	0.34996	0.359776	0.353866	0.390425	0.357772	0.327925	0.360577	0.348558	0.366086	0.373097	0.355268	0.364984	0.357672	0.36849	0.441607	0.378405	0.992588	0.997095	0.95633	0.965645	0.920272	0.996595	0.9998	0.999199	0.9999	0.999399	1	0.9998	0.999399	0.9999	0.999599	1	0.9999	0.9997	1	1
ResNet18	DANN		0.354968	0.365084	0.389523	0.36859	0.380208	0.36879	0.364183	0.395232	0.370994	0.431991	0.370192	0.367488	0.364683	0.361378	0.369491	0.36849	0.361879	0.391627	0.354567	0.383714	0.394932	0.366486	0.41256	0.43129	0.471554	0.888421	0.953125	0.9999	0.981771	0.954227	0.9997	0.9997	0.9997	1	0.9998	0.999299	0.9999	1	1	0.9998	1	0.9999	1	1	0.9998
ResNet18	BN-Adapt		0.341446	0.334335	0.344451	0.341847	0.360477	0.345553	0.340144	0.332131	0.339543	0.346354	0.354067	0.337841	0.34355	0.345152	0.340545	0.335537	0.350761	0.348357	0.361278	0.332232	0.343149	0.353065	0.332833	0.364984	0.360978	0.493289	0.801983	0.865685	0.790665	0.576022	1	0.9998	0.999499	0.999199	0.946514	0.9999	1	1	0.9998	1	0.9998	0.9999	1	0.999599	1
ResNet18	JTT		0.354067	0.357171	0.344251	0.344251	0.366587	0.33143	0.334034	0.33103	0.346154	0.382212	0.350861	0.344651	0.360577	0.361378	0.369591	0.349459	0.337039	0.361579	0.345954	0.339443	0.373798	0.369692	0.353766	0.38121	0.354367	0.558894	0.650341	0.996194	0.686799	0.63131	0.998498	0.9999	0.998498	0.999599	0.9997	1	0.9999	0.9999	0.9998	1	1	0.9998	0.9998	0.9999	0.9998
ResNet18	CycleGAN		0.4999	0.997396	0.373598	0.823017	0.998898	0.693309	0.9999	0.998598	0.9998	0.999599	1	1	0.9998	0.740685	1	0.9999	0.999599	0.9999	0.9999	0.9999	0.9997	0.9999	0.999599	1	0.999399	0.9997	0.9999	0.9998	0.999599	0.9999	0.9999	0.9997	0.9999	0.999499	1	0.999499	0.9997	1	0.9999	0.9999	0.9998	0.9999	0.999499	0.9999	0.9998
MLP	B-VAE		0.359075	0.364884	0.362881	0.355469	0.355869	0.348558	0.372095	0.375401	0.390425	0.374599	0.379607	0.378606	0.385417	0.357071	0.360577	0.361579	0.387821	0.36859	0.369591	0.370994	0.40024	0.369792	0.373397	0.377804	0.379708	0.470052	0.471154	0.453325	0.530749	0.504507	0.645433	0.51893	0.641026	0.616286	0.530148	0.784956	0.765425	0.799179	0.789062	0.804087	0.894531	0.901943	0.884315	0.902043	0.885317
ResNet18	PreTrained on ImageNet		0.373397	0.321514	0.364884	0.371194	0.355469	0.46234	0.378706	0.401843	0.385116	0.405749	0.473157	0.476863	0.442007	0.593049	0.539163	0.975962	0.958734	0.965745	0.977264	0.971755	0.98758	0.993289	0.991386	0.990385	0.997296	1	1	0.9999	0.9998	1	1	1	0.9998	0.9999	1	1	1	0.9999	0.9998	0.9999	1	1	1	1	1

## Sheet: dSprites (l=color, p=shape)
Unseen data shift			Results (Top 1 Accuracy):
Model	Algorithm	Seed:	1	2	3	4	5
ResNet18	ERM		1	1	1	1	1
ResNet50	ERM		1	1	1	1	1
ResNet101	ERM		1	1	1	1	1
ViT	ERM		1	1	1	1	1
MLP	ERM		1	1	1	1	1
ResNet18	ERM+ImageNet Augm		1	1	1	1	1
ResNet18	ERM+AugMix Augm		1	1	1	1	1
ResNet18	ERM+RandAugment Augm		1	1	1	1	1
ResNet18	ERM+AutoAugment Augm		1	0.9999	1	1	1
ResNet18	IRM		1	1	0.9999	1	1
ResNet18	CORAL		1	1	0.9999	1	1
ResNet18	MixUp		1	1	0.9999	1	1
ResNet18	SagNet		1	1	1	1	1
ResNet18	DANN		1	1	1	1	1
ResNet18	BN-Adapt		1	1	1	1	1
ResNet18	JTT		1	1	1	1	1
ResNet18	CycleGAN		0.982071	0.9998	0.929888	0.75621	0.998598
ResNet18	B-VAE		0.9999	0.9998	1	0.9997	0.999599
ResNet18	PreTrained on ImageNet		1	1	1	1	1

## Sheet: MPI3D
Unseen data shift			Results (Top 1 Accuracy):
Model	Algorithm	Seed:	1	2	3	4	5
ResNet18	ERM		0.5624	0.5624	0.55619	0.54978	0.572316
ResNet50	ERM		0.585236	0.584635	0.600361	0.598057	0.582532
ResNet101	ERM		0.60026	0.58754	0.603566	0.587841	0.597756
ViT	ERM		0.523638	0.519331	0.529848	0.528145	0.530749
MLP	ERM		0.477264	0.469151	0.476663	0.480168	0.476562
ResNet18	ERM+ImageNet Augm		0.696514	0.692508	0.677784	0.680288	0.687901
ResNet18	ERM+AugMix Augm		0.625401	0.639724	0.641426	0.630909	0.634215
ResNet18	ERM+RandAugment Augm		0.569111	0.581731	0.578626	0.564503	0.555889
ResNet18	ERM+AutoAugment Augm		0.60627	0.58103	0.601763	0.583433	0.592548
ResNet18	IRM		0.605369	0.58774	0.58724	0.597957	0.600461
ResNet18	CORAL		0.610076	0.590845	0.598357	0.596454	0.595052
ResNet18	MixUp		0.595353	0.58774	0.593149	0.586138	0.596755
ResNet18	SagNet		0.569812	0.497897	0.538261	0.537861	0.409756
ResNet18	DANN		0.602464	0.603365	0.598257	0.610477	0.596955
ResNet18	BN-Adapt		0.589844	0.581831	0.594151	0.587039	0.600861
ResNet18	JTT		0.607672	0.576623	0.595453	0.579026	0.598458
ResNet18	CycleGAN		0.654948	0.635717	0.619191	0.601663	0.64353
ResNet18	B-VAE		0.538361	0.577825	0.58724	0.577624	0.58123
ResNet18	PreTrained on ImageNet		0.9372	0.9372	0.9372	0.9372	0.9372
Low data shift		N:	1					5					10					50					100					500					1000					5000					10000
Model	Algorithm		1	2	3	4	5	1	2	3	4	5	1	2	3	4	5	1	2	3	4	5	1	2	3	4	5	1	2	3	4	5	1	2	3	4	5	1	2	3	4	5	1	2	3	4	5
ResNet18	ERM		0.592248	0.547676	0.599058	0.607372	0.572216	0.616587	0.630208	0.610777	0.614183	0.607372	0.632312	0.666166	0.621795	0.641226	0.605769	0.692508	0.682492	0.646735	0.645433	0.661458	0.66897	0.6877	0.663562	0.666667	0.670573	0.767428	0.763522	0.761619	0.761819	0.7497	0.840345	0.839243	0.84976	0.839643	0.845453	0.968049	0.967147	0.965445	0.971154	0.959936	0.982873	0.984675	0.983774	0.984175	0.986879
ResNet50	ERM		0.591146	0.597556	0.557993	0.618289	0.561799	0.653946	0.63101	0.610076	0.625801	0.624399	0.689704	0.661258	0.636619	0.655649	0.652544	0.703125	0.678886	0.686999	0.673978	0.702524	0.715345	0.698117	0.692708	0.706931	0.714944	0.795773	0.768329	0.759215	0.775541	0.767829	0.853966	0.85006	0.822115	0.844551	0.85597	0.965144	0.959836	0.958834	0.96254	0.96234	0.985877	0.983173	0.982973	0.981771	0.982372
ResNet101	ERM		0.622095	0.597456	0.578225	0.597155	0.559295	0.665365	0.629107	0.623197	0.634014	0.620192	0.688401	0.656951	0.638321	0.672276	0.642728	0.697817	0.674279	0.678886	0.68099	0.686298	0.699119	0.694211	0.702624	0.685397	0.689403	0.783053	0.76853	0.772135	0.785857	0.790966	0.840745	0.847756	0.838742	0.866286	0.845954	0.962139	0.958934	0.964343	0.96254	0.957833	0.985176	0.980369	0.987179	0.983173	0.980569
ViT	ERM		0.526042	0.508714	0.52524	0.550381	0.552784	0.554087	0.54387	0.552384	0.538562	0.527744	0.552684	0.565705	0.560497	0.562901	0.527845	0.605369	0.572917	0.583734	0.590044	0.583433	0.616186	0.583734	0.601562	0.60607	0.590445	0.658654	0.651843	0.646234	0.644231	0.638421	0.688702	0.6875	0.67528	0.688101	0.693309	0.793169	0.801482	0.790465	0.79978	0.795573	0.860978	0.871595	0.857472	0.852163	0.848958
MLP	ERM		0.468049	0.480669	0.470653	0.470152	0.465345	0.473157	0.475561	0.466647	0.469651	0.482772	0.484776	0.477063	0.482873	0.488181	0.48748	0.519231	0.519932	0.505509	0.503806	0.520232	0.539163	0.528546	0.524439	0.515024	0.53115	0.597256	0.596655	0.579127	0.588241	0.578225	0.652143	0.6251	0.622596	0.619191	0.636719	0.759615	0.754507	0.747296	0.733073	0.732572	0.792768	0.801583	0.802684	0.782051	0.797276
ResNet18	ERM+ImageNet Augm		0.69361	0.639323	0.632111	0.651442	0.673478	0.674179	0.661458	0.613782	0.622696	0.670974	0.677284	0.667067	0.632512	0.634014	0.621094	0.717448	0.667067	0.657552	0.6872	0.689203	0.727464	0.722857	0.692808	0.6875	0.701823	0.678385	0.681691	0.680789	0.713041	0.729167	0.715545	0.657051	0.649639	0.667167	0.719752	0.782151	0.758413	0.772636	0.794872	0.75631	0.823518	0.777043	0.823918	0.788962	0.792869
ResNet18	ERM+AugMix Augm		0.623397	0.58113	0.559295	0.59365	0.570613	0.566506	0.616186	0.533153	0.591446	0.57512	0.592147	0.504407	0.565705	0.59345	0.545172	0.61228	0.597756	0.606871	0.597556	0.604868	0.611378	0.608173	0.605769	0.596154	0.629207	0.596354	0.570513	0.58764	0.591847	0.568309	0.561198	0.573417	0.559395	0.572316	0.580629	0.697216	0.706831	0.699119	0.71244	0.724559	0.769431	0.776542	0.775441	0.763221	0.786558
ResNet18	ERM+RandAugment Augm		0.508514	0.542468	0.526242	0.5623	0.48107	0.557292	0.515024	0.48728	0.515525	0.45653	0.476763	0.495893	0.502804	0.524038	0.500801	0.55649	0.52494	0.527845	0.553986	0.545873	0.532252	0.554187	0.558293	0.530449	0.496595	0.489383	0.545373	0.538962	0.520333	0.51262	0.46855	0.444111	0.477464	0.489183	0.440905	0.41226	0.39403	0.391126	0.392328	0.372897	0.452624	0.466747	0.497696	0.414663	0.46845
ResNet18	ERM+AutoAugment Augm		0.626002	0.528946	0.547776	0.564603	0.485577	0.642127	0.595453	0.560697	0.51903	0.528546	0.586538	0.582632	0.517528	0.554587	0.495292	0.6248	0.589143	0.586939	0.591346	0.579327	0.619191	0.577224	0.590545	0.593149	0.611579	0.561198	0.536058	0.538462	0.542869	0.529848	0.629107	0.494692	0.602764	0.513021	0.516827	0.591546	0.595753	0.574519	0.591246	0.555088	0.719651	0.690104	0.710136	0.674379	0.706931
ResNet18	IRM		0.612881	0.614984	0.580829	0.579227	0.577424	0.66266	0.640925	0.641326	0.604467	0.647837	0.694211	0.683193	0.64383	0.665164	0.673578	0.716246	0.685597	0.691306	0.679688	0.696915	0.713141	0.699519	0.700621	0.701022	0.676182	0.785256	0.783253	0.780449	0.796875	0.772436	0.864083	0.849659	0.857171	0.84986	0.861478	0.970553	0.966246	0.968149	0.96885	0.963241	0.988982	0.985677	0.986679	0.984876	0.985978
ResNet18	CORAL		0.640325	0.590345	0.595052	0.615084	0.566607	0.65625	0.622796	0.6247	0.637119	0.643329	0.697917	0.666366	0.620192	0.662961	0.646635	0.713542	0.67478	0.684095	0.680889	0.676282	0.688502	0.698718	0.659756	0.66256	0.674279	0.771735	0.767228	0.753506	0.77514	0.741987	0.853065	0.839343	0.841246	0.847155	0.856971	0.97496	0.965845	0.966647	0.968249	0.965044	0.989483	0.982772	0.985677	0.985276	0.982272
ResNet18	MixUp		0.575621	0.565304	0.563301	0.583133	0.54998	0.671474	0.644732	0.588742	0.576623	0.626002	0.682292	0.681991	0.610577	0.661659	0.658754	0.688902	0.699018	0.666667	0.659255	0.681891	0.704928	0.703125	0.704427	0.689804	0.669471	0.769531	0.779647	0.760116	0.78125	0.784756	0.846454	0.850661	0.84405	0.838842	0.861178	0.966146	0.969651	0.964443	0.963341	0.968049	0.984675	0.984876	0.983774	0.985477	0.982672
ResNet18	SagNet		0.398237	0.341647	0.296975	0.312901	0.313001	0.428786	0.439704	0.357772	0.386118	0.464343	0.446214	0.494591	0.472356	0.439203	0.323618	0.389022	0.517027	0.560296	0.396635	0.426482	0.633213	0.545072	0.5623	0.632111	0.624399	0.54357	0.716546	0.61859	0.744091	0.733173	0.676082	0.735777	0.801482	0.792668	0.827424	0.949219	0.887921	0.940705	0.885216	0.932492	0.848458	0.978966	0.961338	0.940805	0.915565
ResNet18	DANN		0.621895	0.587841	0.570212	0.569712	0.555889	0.641426	0.635317	0.614984	0.597456	0.636418	0.685897	0.688201	0.642628	0.662961	0.664263	0.718049	0.696214	0.700621	0.680789	0.695713	0.700721	0.729267	0.717949	0.695613	0.696114	0.789864	0.779547	0.785857	0.786659	0.784455	0.86278	0.848057	0.846254	0.848357	0.857372	0.960537	0.964143	0.966246	0.963942	0.961238	0.983774	0.984976	0.983474	0.983574	0.986779
ResNet18	BN-Adapt		0.573618	0.54367	0.579728	0.579227	0.545172	0.63732	0.65024	0.615585	0.617288	0.641126	0.683594	0.670573	0.623898	0.641727	0.683994	0.695513	0.666767	0.667869	0.672376	0.689002	0.703325	0.70002	0.694311	0.695813	0.675982	0.785557	0.767628	0.772135	0.779147	0.775641	0.85026	0.853566	0.838241	0.849659	0.84365	0.964844	0.960637	0.967548	0.967849	0.963442	0.984776	0.984275	0.984575	0.983774	0.984275
ResNet18	JTT		0.609075	0.5627	0.582131	0.589243	0.532652	0.647736	0.640024	0.622296	0.590645	0.66266	0.669171	0.700921	0.625701	0.67518	0.661358	0.689403	0.690304	0.672175	0.675481	0.666066	0.70633	0.676583	0.678786	0.685497	0.680389	0.769131	0.77524	0.773738	0.766927	0.765725	0.840345	0.845152	0.851663	0.848658	0.848357	0.960637	0.960537	0.964944	0.969651	0.96224	0.986078	0.984475	0.982272	0.984175	0.982372
ResNet18	CycleGAN		0.592047	0.551783	0.566907	0.536859	0.567107	0.739683	0.677183	0.76252	0.740084	0.571815	0.73097	0.6878	0.719651	0.769431	0.740084	0.8126	0.816707	0.845553	0.828926	0.822216	0.822716	0.771735	0.834235	0.848057	0.860577	0.807392	0.860677	0.796575	0.834936	0.848057	0.835437	0.841246	0.819411	0.826522	0.855268	0.917969	0.897336	0.889724	0.923678	0.847957	0.889423	0.884415	0.89393	0.919271	0.911859
ResNet18	B-VAE		0.538862	0.559595	0.523938	0.544171	0.538261	0.603365	0.585537	0.551883	0.535657	0.53776	0.561899	0.539563	0.613482	0.569912	0.55599	0.522236	0.561799	0.598257	0.590845	0.57472	0.554587	0.520132	0.583333	0.522236	0.585136	0.629908	0.621294	0.680088	0.634716	0.665264	0.678986	0.716947	0.746194	0.727664	0.653145	0.858774	0.903446	0.896434	0.902244	0.903145	0.92528	0.944712	0.9376	0.938702	0.938101
ResNet18	PreTrained on ImageNet		0.932392	0.88772	0.907552	0.889523	0.875	0.959034	0.946414	0.946815	0.948017	0.934095	0.953225	0.958133	0.959235	0.935597	0.950421	0.970453	0.972957	0.973257	0.972857	0.976963	0.972656	0.981571	0.980769	0.976863	0.98768	0.99379	0.992188	0.992588	0.990986	0.99399	0.995693	0.996895	0.993389	0.995893	0.995593	0.998097	0.998197	0.998998	0.998297	0.998898	0.999499	0.999199	0.999299	0.999099	0.999299
Spurious correlation		N:	1					5					10					50					100					500					1000					5000					10000
Model	Algorithm	Seed:	1	2	3	4	5	1	2	3	4	5	1	2	3	4	5	1	2	3	4	5	1	2	3	4	5	1	2	3	4	5	1	2	3	4	5	1	2	3	4	5	1	2	3	4	5
ResNet18	ERM		0.167869	0.175581	0.170172	0.171474	0.16897	0.169071	0.173678	0.169772	0.169872	0.170873	0.171474	0.170974	0.169371	0.175381	0.172075	0.172576	0.180689	0.17528	0.181791	0.178986	0.198317	0.191607	0.195212	0.196815	0.197616	0.297175	0.308093	0.292768	0.311098	0.321815	0.438602	0.427384	0.410457	0.436298	0.419671	0.821615	0.829928	0.798077	0.819912	0.819511	0.92498	0.935296	0.92488	0.921575	0.935797
ResNet50	ERM		0.193309	0.194411	0.191406	0.1875	0.176182	0.184595	0.190405	0.184095	0.1875	0.193009	0.1878	0.195613	0.191306	0.190805	0.1873	0.199419	0.195813	0.189503	0.198918	0.192308	0.205228	0.198117	0.19992	0.208133	0.194912	0.302684	0.308794	0.308494	0.320813	0.310897	0.389323	0.39984	0.387821	0.39363	0.428085	0.8122	0.764724	0.785457	0.769231	0.77504	0.905148	0.913261	0.923377	0.90645	0.915164
ResNet101	ERM		0.192208	0.195413	0.194611	0.188301	0.184295	0.193409	0.189002	0.178986	0.1876	0.185797	0.189002	0.191406	0.185597	0.1872	0.1877	0.197115	0.195713	0.191006	0.202224	0.191506	0.206931	0.196414	0.197015	0.210837	0.201422	0.297776	0.306791	0.320012	0.324219	0.305489	0.39974	0.391526	0.39363	0.411058	0.388922	0.77474	0.759515	0.780349	0.779147	0.771935	0.913962	0.911358	0.910857	0.90655	0.90655
ViT	ERM		0.189403	0.183093	0.177284	0.182192	0.179688	0.179287	0.182192	0.178786	0.1874	0.180589	0.182192	0.181791	0.181591	0.182192	0.182192	0.1874	0.184295	0.182893	0.186098	0.183994	0.183393	0.186198	0.188201	0.190805	0.1877	0.220052	0.207732	0.22476	0.222556	0.218349	0.247997	0.248297	0.245593	0.242388	0.239984	0.378205	0.385817	0.382312	0.383914	0.382011	0.503305	0.496094	0.501002	0.505609	0.500401
MLP	ERM		0.220853	0.229968	0.211038	0.207632	0.210437	0.229467	0.213241	0.220954	0.211038	0.214343	0.223458	0.221655	0.21885	0.215545	0.223157	0.233173	0.228866	0.230168	0.245793	0.236178	0.25	0.248097	0.258113	0.248097	0.255208	0.301482	0.296474	0.304387	0.302384	0.308794	0.348257	0.348958	0.336538	0.354868	0.353265	0.516326	0.528245	0.535457	0.539864	0.527945	0.658654	0.647135	0.663662	0.646234	0.657953
ResNet18	ERM+ImageNet Augm		0.190505	0.185797	0.178486	0.194812	0.200521	0.196915	0.191406	0.199319	0.196815	0.189603	0.196615	0.189303	0.194712	0.192608	0.188702	0.195813	0.192708	0.190705	0.201422	0.196014	0.194311	0.199619	0.198217	0.19361	0.197817	0.204026	0.207632	0.203125	0.203425	0.209936	0.216847	0.204627	0.214143	0.219151	0.205429	0.285457	0.302384	0.312901	0.289964	0.297476	0.471855	0.429287	0.454327	0.462941	0.476963
ResNet18	ERM+AugMix Augm		0.180889	0.182091	0.194812	0.177384	0.174079	0.17498	0.16877	0.17508	0.175781	0.171675	0.174579	0.175881	0.175481	0.173077	0.174079	0.177083	0.171174	0.179087	0.177584	0.173978	0.173478	0.174079	0.17528	0.175381	0.172676	0.178285	0.183193	0.175481	0.180389	0.179788	0.189603	0.184295	0.185697	0.180288	0.182091	0.292468	0.248498	0.3127	0.271434	0.279147	0.38752	0.420573	0.412961	0.413662	0.402444
ResNet18	ERM+RandAugment Augm		0.173878	0.188802	0.190505	0.178185	0.175681	0.170272	0.181991	0.169772	0.175481	0.173478	0.177584	0.178686	0.176683	0.182192	0.17518	0.178986	0.174179	0.183494	0.177284	0.186098	0.172376	0.180589	0.175781	0.1873	0.186799	0.182993	0.181991	0.176883	0.176382	0.18119	0.175781	0.177284	0.186699	0.183594	0.176983	0.199219	0.186498	0.19361	0.193309	0.20002	0.207632	0.208734	0.211839	0.207732	0.238782
ResNet18	ERM+AutoAugment Augm		0.180288	0.18109	0.177584	0.177183	0.181691	0.179587	0.179087	0.179387	0.176082	0.182492	0.171675	0.176983	0.185797	0.176983	0.180188	0.173077	0.177684	0.171474	0.180389	0.186298	0.175881	0.179187	0.181791	0.176683	0.172676	0.180689	0.18109	0.182592	0.189103	0.182192	0.182492	0.184495	0.179187	0.189403	0.179387	0.207833	0.210036	0.215244	0.221955	0.201823	0.307091	0.292067	0.323918	0.320913	0.315705
ResNet18	IRM		0.180589	0.181891	0.186498	0.191907	0.186999	0.180889	0.183594	0.181591	0.192808	0.185697	0.183994	0.175982	0.187901	0.192909	0.185196	0.184395	0.186699	0.199519	0.204728	0.19401	0.202424	0.203926	0.204928	0.223558	0.204828	0.340144	0.323518	0.311999	0.345954	0.328626	0.488882	0.451623	0.444511	0.451222	0.436298	0.837039	0.834135	0.834635	0.819311	0.822616	0.932993	0.922276	0.936098	0.923878	0.933193
ResNet18	CORAL		0.186098	0.182392	0.1873	0.196114	0.179888	0.18119	0.178385	0.177684	0.185196	0.191206	0.180389	0.174279	0.188001	0.194912	0.188001	0.193109	0.186398	0.214844	0.192608	0.192208	0.227364	0.207432	0.215845	0.212841	0.217949	0.314704	0.311198	0.316506	0.33774	0.345353	0.47476	0.45633	0.438001	0.447716	0.436098	0.807492	0.820112	0.80639	0.806891	0.823217	0.927484	0.938502	0.9375	0.936398	0.929688
ResNet18	MixUp		0.186198	0.180589	0.192808	0.182592	0.186999	0.18119	0.178586	0.17508	0.183393	0.189002	0.182592	0.176082	0.183393	0.182292	0.181891	0.188602	0.190605	0.191106	0.198718	0.188502	0.200321	0.203225	0.192909	0.212841	0.204427	0.305689	0.32522	0.319611	0.342949	0.341747	0.448618	0.458734	0.44982	0.464844	0.452624	0.832732	0.820713	0.809896	0.814804	0.834135	0.928986	0.935196	0.944611	0.915164	0.940805
ResNet18	SagNet		0.180689	0.18129	0.191807	0.189503	0.179688	0.180689	0.189403	0.189503	0.201823	0.191006	0.184395	0.182192	0.207432	0.205829	0.201623	0.198818	0.205028	0.199018	0.221054	0.204327	0.226763	0.216446	0.228365	0.221454	0.211939	0.263622	0.291567	0.282853	0.346755	0.283754	0.336939	0.393329	0.388121	0.408854	0.414363	0.823317	0.783253	0.762119	0.764523	0.73117	0.908053	0.836839	0.929988	0.90004	0.813001
ResNet18	DANN		0.1874	0.190705	0.192408	0.196514	0.189303	0.209535	0.191807	0.1875	0.19351	0.205329	0.191106	0.194311	0.201923	0.212039	0.189603	0.208133	0.207532	0.229167	0.226262	0.230669	0.252905	0.21875	0.231571	0.227965	0.235577	0.350461	0.331831	0.346254	0.36258	0.363181	0.467648	0.475461	0.447716	0.46855	0.458233	0.831731	0.834235	0.840845	0.830228	0.843149	0.931991	0.939804	0.932692	0.931991	0.936999
ResNet18	BN-Adapt		0.184095	0.1873	0.185998	0.183594	0.177384	0.191406	0.180489	0.174379	0.192708	0.183994	0.181791	0.175481	0.179387	0.1875	0.182592	0.188502	0.185497	0.190004	0.192408	0.188001	0.195913	0.195813	0.194311	0.209335	0.202123	0.343149	0.3126	0.306891	0.34385	0.334836	0.446615	0.436599	0.441807	0.444812	0.429788	0.822716	0.840645	0.807592	0.807292	0.823217	0.925781	0.928586	0.944611	0.919171	0.93119
ResNet18	JTT		0.18119	0.180789	0.197216	0.186398	0.173277	0.185196	0.18129	0.179187	0.182692	0.189103	0.18109	0.174379	0.190405	0.190004	0.183994	0.185797	0.1878	0.19361	0.199519	0.189403	0.210537	0.195012	0.207732	0.215946	0.218149	0.338241	0.322216	0.319912	0.330929	0.332031	0.459535	0.458834	0.444912	0.444611	0.450421	0.841747	0.816306	0.814704	0.830629	0.835036	0.932792	0.930489	0.93099	0.917768	0.930389
ResNet18	CycleGAN		0.296374	0.328826	0.308694	0.316206	0.394531	0.453626	0.33103	0.423878	0.394832	0.393029	0.445312	0.357672	0.418169	0.460537	0.39403	0.464643	0.450821	0.539163	0.481871	0.53135	0.527344	0.499399	0.48137	0.466046	0.491787	0.535857	0.546174	0.616887	0.651242	0.659255	0.610777	0.63151	0.713141	0.635517	0.633313	0.829828	0.832332	0.817308	0.80639	0.742087	0.822917	0.839042	0.84365	0.899139	0.810897
ResNet18	B-VAE		0.259716	0.242388	0.275541	0.240084	0.250701	0.258614	0.23728	0.250801	0.252304	0.250601	0.258313	0.253706	0.247796	0.258614	0.259916	0.26262	0.26262	0.265425	0.259215	0.258714	0.240385	0.272236	0.253305	0.267829	0.260317	0.277244	0.316506	0.327023	0.322416	0.301883	0.294271	0.35637	0.376002	0.361278	0.391326	0.463542	0.683293	0.684195	0.646134	0.685497	0.759415	0.779347	0.788061	0.772236	0.788161
ResNet18	PreTrained on ImageNet		0.223458	0.227664	0.217548	0.245793	0.19371	0.280349	0.236078	0.264824	0.247596	0.241186	0.282051	0.267628	0.291466	0.272736	0.253506	0.369191	0.34986	0.404647	0.358073	0.365986	0.486478	0.499499	0.498498	0.477664	0.507612	0.783454	0.747696	0.769832	0.761318	0.767027	0.877704	0.868289	0.873498	0.868389	0.864784	0.988281	0.988582	0.988982	0.990986	0.98768	0.994892	0.996094	0.997596	0.997396	0.997196

## Sheet: Shapes3D
Unseen data shift			Results (Top 1 Accuracy):
Model	Algorithm	Seed:	1	2	3	4	5
ResNet18	ERM		0.821615	0.877704	0.774539	0.852063	0.8123
ResNet50	ERM		0.741687	0.731571	0.755909	0.749299	0.764724
ResNet101	ERM		0.728165	0.748397	0.742788	0.763622	0.752604
ViT	ERM		0.59395	0.632312	0.623698	0.618389	0.585337
MLP	ERM		0.625801	0.620393	0.611779	0.591046	0.601863
ResNet18	ERM+ImageNet Augm		0.999499	0.999399	0.997696	0.997897	0.998498
ResNet18	ERM+AugMix Augm		0.94972	0.971955	0.957131	0.967448	0.953926
ResNet18	ERM+RandAugment Augm		0.982873	0.991587	0.988482	0.985076	0.987981
ResNet18	ERM+AutoAugment Augm		0.990785	0.98748	0.980268	0.989183	0.988782
ResNet18	IRM		0.827424	0.864083	0.781951	0.871995	0.828526
ResNet18	CORAL		0.897636	0.951723	0.919171	0.948718	0.923578
ResNet18	MixUp		0.814804	0.923578	0.753806	0.866486	0.865184
ResNet18	SagNet		0.915765	0.889724	0.891426	0.906951	0.821414
ResNet18	DANN		0.98127	0.992688	0.950521	0.971655	0.969952
ResNet18	BN-Adapt		0.811198	0.888822	0.777444	0.863281	0.810096
ResNet18	JTT		0.821615	0.889523	0.798277	0.867889	0.8123
ResNet18	CycleGAN		0.945513	0.944611	0.972356	0.972656	0.953926
ResNet18	B-VAE		0.59375	0.601863	0.5627	0.546474	0.566406
ResNet18	PreTrained on ImageNet		0.997897	0.997897	0.997897	0.997897	0.997897
Low data shift		N:	1					5					10					50					100					500					1000					5000					10000
Model	Algorithm	Seed number:	1	2	3	4	5	1	2	3	4	5	1	2	3	4	5	1	2	3	4	5	1	2	3	4	5	1	2	3	4	5	1	2	3	4	5	1	2	3	4	5	1	2	3	4	5
ResNet18	ERM		0.7498	0.815104	0.760216	0.898838	0.728265	0.938502	0.947115	0.85597	0.933293	0.917969	0.906851	0.964944	0.82472	0.961238	0.912861	0.980469	0.994491	0.994892	0.98778	0.976462	0.997296	0.999499	0.998197	0.997296	0.996094	0.9999	0.9999	0.9999	1	0.9998	1	1	1	1	0.9999	1	1	0.9999	1	1	1	1	1	1	1
ResNet50	ERM		0.658554	0.679187	0.617087	0.637019	0.592047	0.848958	0.825721	0.645933	0.765625	0.72486	0.811498	0.805288	0.706831	0.866987	0.814103	0.980469	0.973558	0.960637	0.949018	0.992488	0.991086	0.970553	0.998397	0.994291	0.996194	0.998898	0.999599	0.9998	1	0.999399	0.9998	0.9998	0.9999	1	0.9997	0.9997	1	1	1	1	0.9999	1	1	1	1
ResNet101	ERM		0.624099	0.683794	0.626903	0.636018	0.594351	0.775341	0.73117	0.683894	0.803486	0.776843	0.922276	0.809395	0.716246	0.830829	0.744591	0.942007	0.990184	0.965845	0.932091	0.939704	0.978466	0.994692	0.992788	0.994692	0.989583	1	0.999599	0.999499	0.9997	0.998698	1	1	1	0.9998	1	0.9999	0.9999	1	1	1	0.9998	1	1	1	1
ViT	ERM		0.636218	0.672877	0.611779	0.617889	0.583634	0.693109	0.731971	0.615685	0.696214	0.672776	0.690805	0.715445	0.623898	0.748297	0.685296	0.851362	0.85607	0.792568	0.870493	0.809095	0.880509	0.895833	0.883213	0.908053	0.887921	0.988582	0.986478	0.991286	0.98147	0.988682	0.997796	0.996194	0.995994	0.998097	0.997095	0.9998	1	1	0.9999	0.9999	0.9999	0.9999	0.9997	0.999399	0.9999
MLP	ERM		0.603866	0.557192	0.611378	0.603365	0.595252	0.640825	0.6251	0.651943	0.664163	0.617087	0.66256	0.615084	0.645733	0.66897	0.630909	0.865284	0.855068	0.790665	0.820012	0.798177	0.891627	0.926583	0.909455	0.860777	0.866186	0.986478	0.982873	0.989884	0.989884	0.989483	0.995893	0.99349	0.994191	0.997796	0.994491	0.999599	0.999599	0.9997	0.9998	0.9998	1	1	0.9998	0.9997	1
ResNet18	ERM+ImageNet Augm		0.990685	0.982572	0.963141	0.996294	0.994391	0.992989	0.995593	0.994992	0.991687	0.996294	0.996995	0.997796	0.995994	0.996695	0.998498	0.998598	0.999199	0.999099	0.998898	0.998297	0.998798	0.997596	0.998698	0.997696	0.995994	0.998498	0.998397	0.998498	0.999099	0.998197	0.998397	0.998998	0.998998	0.999199	0.9999	0.999199	0.9998	0.9998	0.999599	0.999499	0.999599	0.9999	1	0.9997	0.9998
ResNet18	ERM+AugMix Augm		0.91236	0.918069	0.884716	0.906951	0.879307	0.958133	0.960337	0.939503	0.920172	0.91256	0.953325	0.954427	0.947616	0.946915	0.966046	0.951222	0.968249	0.966046	0.964343	0.989984	0.969752	0.967849	0.958333	0.965144	0.966346	0.986078	0.984675	0.979367	0.990485	0.984976	0.995393	0.992889	0.996795	0.992788	0.990585	0.999399	0.9999	0.999399	0.999199	0.999499	0.999499	0.9999	0.999599	0.999399	0.9998
ResNet18	ERM+RandAugment Augm		0.97506	0.953125	0.95633	0.960437	0.969651	0.984075	0.983273	0.952324	0.971354	0.967849	0.973558	0.98738	0.983674	0.97506	0.984075	0.989483	0.988081	0.989283	0.982873	0.988281	0.990385	0.988682	0.98728	0.983874	0.985777	0.985477	0.980769	0.986779	0.981671	0.976162	0.969251	0.976663	0.971755	0.986478	0.982472	0.998097	0.998397	0.997095	0.997997	0.988181	0.998798	0.998998	0.999199	0.997997	0.997897
ResNet18	ERM+AutoAugment Augm		0.97506	0.965244	0.926983	0.927684	0.969952	0.976763	0.972656	0.946815	0.979667	0.986679	0.992588	0.982973	0.987179	0.985477	0.989483	0.990084	0.988582	0.995092	0.992688	0.986679	0.991887	0.986478	0.99359	0.991787	0.991687	0.988181	0.988381	0.992488	0.988081	0.990585	0.991486	0.99349	0.994992	0.99379	0.996995	0.999199	0.998498	0.998197	0.998397	0.998397	0.999299	0.998798	0.9998	0.999599	0.999599
ResNet18	IRM		0.795974	0.93099	0.850461	0.902344	0.767728	0.920072	0.946514	0.94972	0.9377	0.901242	0.921675	0.97496	0.883113	0.970753	0.958834	0.992087	0.997596	0.994291	0.991486	0.99349	0.997997	0.999099	0.998598	0.998397	0.997696	0.9999	0.999599	0.9999	1	0.9998	0.9999	0.9999	0.9999	1	1	1	0.9999	1	1	0.9999	1	1	1	1	1
ResNet18	CORAL		0.851863	0.915164	0.838041	0.952524	0.834535	0.91236	0.920573	0.898838	0.966947	0.958333	0.917167	0.961438	0.861979	0.96875	0.953526	0.985978	0.997796	0.994591	0.993189	0.985076	0.998297	0.999199	0.998998	0.998998	0.998798	0.9999	0.9999	0.9998	1	1	1	1	0.9998	1	1	0.9999	1	0.9999	1	1	1	1	1	1	1
ResNet18	MixUp		0.668169	0.917268	0.786358	0.909054	0.711538	0.890925	0.936899	0.859776	0.938502	0.951923	0.922276	0.959635	0.802183	0.954427	0.95002	0.998598	0.994391	0.991887	0.979367	0.951222	0.997196	0.998698	0.998197	0.998498	0.994491	0.9997	0.9998	0.9998	1	0.9999	1	0.9999	0.9999	1	0.9999	1	1	1	1	1	1	1	1	1	1
ResNet18	SagNet		0.780749	0.852264	0.821014	0.78756	0.798978	0.917067	0.934796	0.859375	0.947316	0.959535	0.921575	0.960737	0.807893	0.904547	0.952825	0.994291	0.995493	0.994191	0.982372	0.985978	0.998097	0.997997	0.996895	0.998498	0.997496	0.999299	1	0.998698	0.999099	1	1	1	0.999399	0.9997	0.9998	1	1	0.9999	0.9997	1	0.999499	0.9999	1	0.9999	0.9999
ResNet18	DANN		0.863782	0.897736	0.913462	0.904046	0.943309	0.957933	0.981771	0.945813	0.954728	0.989083	0.96905	0.990284	0.947917	0.982973	0.973057	0.999099	0.998097	0.998798	0.997095	0.996094	0.999099	0.999499	0.999299	0.998998	0.9998	1	0.9999	0.9998	1	0.9999	1	0.9998	1	0.9999	1	1	1	1	1	0.9999	1	1	1	1	1
ResNet18	BN-Adapt		0.730068	0.848658	0.813001	0.829127	0.730268	0.901142	0.927885	0.854467	0.947416	0.857572	0.896735	0.972756	0.871895	0.985076	0.960437	0.972356	0.997696	0.992388	0.988281	0.953425	0.997196	0.998297	0.99379	0.998498	0.99389	1	1	0.999599	0.9999	1	1	0.9998	1	0.9998	1	1	1	1	1	1	1	1	0.9999	1	1
ResNet18	JTT		0.757111	0.936298	0.747596	0.88151	0.748598	0.886418	0.89403	0.895533	0.935196	0.95653	0.867889	0.955729	0.89363	0.961038	0.88722	0.991587	0.986178	0.986779	0.986078	0.978566	0.998498	0.999499	0.999599	0.997696	0.992188	0.9997	0.9999	0.9999	0.9997	0.999299	0.9999	0.9998	0.9998	1	1	0.9999	1	1	1	1	1	1	1	1	1
ResNet18	CycleGAN		0.919171	0.983774	0.945913	0.99389	0.927885	0.984275	0.998097	0.998197	0.997596	0.999099	0.998798	0.998798	0.998998	0.997196	1	0.9998	1	1	1	0.9999	0.9999	0.9998	0.9997	1	0.999499	0.9999	1	1	0.9999	1	1	1	1	1	1	1	1	1	1	1	0.9999	1	0.9999	1	0.9999
ResNet18	B-VAE		0.648337	0.627604	0.648237	0.707232	0.580629	0.690004	0.671975	0.60647	0.720853	0.639824	0.714744	0.667368	0.626703	0.774439	0.676082	0.710036	0.711038	0.720954	0.701623	0.708233	0.78155	0.835938	0.831631	0.777945	0.834635	0.997296	0.988281	0.992688	0.996094	0.99379	0.997897	0.999599	0.999499	0.997796	0.9997	1	1	0.9999	1	1	1	1	1	1	1
ResNet18	PreTrained on ImageNet		0.934295	0.998798	0.998798	0.998197	0.928285	0.999499	0.994191	0.998097	0.999599	0.999299	1	0.9998	0.9999	0.9999	0.9998	1	1	1	0.999399	0.9998	1	0.999199	0.9999	1	1	1	1	1	0.9998	1	0.9999	1	1	1	1	1	1	1	0.9999	1	1	1	1	1	1
Spurious correlation		N:	1					5					10					50					100					500					1000					5000					10000
Model	Algorithm	Seed:	1	2	3	4	5	1	2	3	4	5	1	2	3	4	5	1	2	3	4	5	1	2	3	4	5	1	2	3	4	5	1	2	3	4	5	1	2	3	4	5	1	2	3	4	5
ResNet18	ERM		0.400341	0.446715	0.419571	0.404147	0.463241	0.487981	0.545773	0.403245	0.448518	0.419772	0.680589	0.573618	0.430489	0.55639	0.525841	0.78756	0.769932	0.802985	0.888321	0.803486	0.915164	0.88762	0.924179	0.915064	0.935196	0.998998	0.997897	0.998598	0.994491	0.996595	0.9999	0.9998	0.9999	0.999399	0.999499	1	0.9999	1	1	0.9999	1	1	1	1	1
ResNet50	ERM		0.354768	0.358674	0.367488	0.346054	0.427183	0.403345	0.444712	0.378005	0.527143	0.480369	0.489784	0.447917	0.420773	0.565104	0.494892	0.713642	0.663962	0.703225	0.739083	0.776542	0.896835	0.848357	0.837841	0.885517	0.88722	0.996595	0.996494	0.999199	0.989583	0.995693	0.998297	0.998998	0.997997	0.998898	0.999099	1	0.9997	1	0.9999	1	1	1	1	1	1
ResNet101	ERM		0.333233	0.421074	0.389323	0.347756	0.466847	0.365685	0.514623	0.395132	0.429187	0.454627	0.502604	0.471955	0.420673	0.530449	0.425381	0.770232	0.665264	0.669972	0.753105	0.753005	0.931891	0.866587	0.89974	0.915264	0.905349	0.995994	0.995292	0.992288	0.994091	0.99369	0.998498	0.9998	0.999099	0.998998	0.9997	1	1	0.9998	1	1	1	1	1	1	1
ViT	ERM		0.293369	0.291767	0.309696	0.307592	0.33724	0.365184	0.382412	0.429087	0.308694	0.378305	0.436599	0.525641	0.410056	0.395032	0.416667	0.602564	0.58724	0.569812	0.583934	0.608073	0.708133	0.6878	0.6876	0.741587	0.709936	0.948217	0.907652	0.925781	0.944912	0.952925	0.985777	0.990084	0.984575	0.981571	0.986378	0.999499	0.9998	0.9999	0.999399	0.9998	0.999599	0.9999	1	0.999599	0.9997
MLP	ERM		0.293269	0.284155	0.352264	0.280449	0.316406	0.332332	0.353866	0.34976	0.316306	0.286659	0.388321	0.365485	0.400641	0.364683	0.316607	0.55018	0.655449	0.619191	0.584836	0.51262	0.685196	0.75631	0.782252	0.72496	0.705028	0.952424	0.941206	0.947216	0.949219	0.968349	0.982472	0.976062	0.974459	0.982472	0.980569	0.998397	0.997296	0.997997	0.997196	0.998798	0.999399	0.9997	0.998898	0.999299	0.999199
ResNet18	ERM+ImageNet Augm		0.919571	0.941907	0.949018	0.961438	0.965845	0.963141	0.977664	0.971054	0.959535	0.975962	0.964042	0.97476	0.960337	0.969852	0.982171	0.978365	0.977063	0.96234	0.971154	0.974259	0.982572	0.979367	0.992488	0.984175	0.98107	0.994992	0.992788	0.990485	0.992388	0.981771	0.994792	0.99359	0.993389	0.997396	0.99379	0.998998	0.999199	0.999499	0.999099	0.999199	0.998898	0.9998	0.9999	0.999599	0.999599
ResNet18	ERM+AugMix Augm		0.442308	0.461238	0.503405	0.407252	0.45623	0.476162	0.483474	0.427784	0.430288	0.450921	0.483574	0.49349	0.489383	0.55008	0.473057	0.558494	0.564403	0.580629	0.541166	0.546074	0.578425	0.583133	0.558193	0.6873	0.655148	0.732672	0.737079	0.786859	0.727664	0.801783	0.841146	0.82472	0.855369	0.873197	0.801683	0.993289	0.989083	0.991186	0.991486	0.985477	0.997897	0.997796	0.994892	0.997095	0.997396
ResNet18	ERM+RandAugment Augm		0.505208	0.495893	0.58744	0.489583	0.523738	0.53145	0.584335	0.581831	0.541767	0.527244	0.506911	0.557692	0.552985	0.540164	0.554487	0.600361	0.626903	0.639022	0.584836	0.599559	0.652444	0.609475	0.596054	0.615485	0.619291	0.601362	0.672175	0.686899	0.675481	0.710537	0.76893	0.777744	0.776943	0.725361	0.738982	0.945413	0.921374	0.928085	0.920573	0.944712	0.936999	0.981771	0.986278	0.989083	0.984475
ResNet18	ERM+AutoAugment Augm		0.513922	0.502103	0.540365	0.502504	0.59385	0.577123	0.507612	0.547576	0.473257	0.594752	0.497396	0.56901	0.58143	0.591847	0.607572	0.592648	0.61258	0.645132	0.617488	0.631911	0.648638	0.672877	0.642628	0.702023	0.681991	0.725861	0.740284	0.77494	0.749299	0.789663	0.807392	0.800781	0.821514	0.814603	0.808393	0.975461	0.966947	0.979868	0.972656	0.966046	0.988682	0.99369	0.998297	0.991486	0.995593
ResNet18	IRM		0.386018	0.498197	0.482572	0.44992	0.484175	0.500601	0.595252	0.435497	0.484075	0.498498	0.632011	0.612179	0.535857	0.60617	0.51883	0.839543	0.829327	0.804988	0.888121	0.851963	0.938001	0.922276	0.926382	0.954127	0.945713	0.998197	0.998297	0.998698	0.997696	0.998598	0.9998	0.9999	1	0.999599	0.9999	1	1	1	1	1	1	1	1	1	0.9999
ResNet18	CORAL		0.515925	0.474459	0.551683	0.461138	0.510216	0.475661	0.533754	0.479167	0.493389	0.505609	0.64363	0.595753	0.498397	0.544872	0.514523	0.805188	0.79988	0.78135	0.865184	0.821414	0.9373	0.86879	0.928786	0.920873	0.913261	0.999199	0.998598	0.998197	0.998297	0.998097	0.9999	0.9999	0.999599	1	0.999499	1	0.9999	1	1	0.9999	1	1	1	1	1
ResNet18	MixUp		0.416967	0.422075	0.446915	0.442408	0.393429	0.489483	0.5623	0.45613	0.439804	0.509315	0.631711	0.606571	0.539663	0.598858	0.564904	0.836138	0.782953	0.69992	0.861779	0.82482	0.931791	0.896234	0.945813	0.936899	0.941206	0.997296	0.996995	0.998898	0.990485	0.9999	0.999599	0.999399	0.9997	0.9997	0.9999	1	1	1	1	1	1	1	1	0.9997	1
ResNet18	SagNet		0.293269	0.284155	0.352264	0.280449	0.316406	0.332332	0.353866	0.34976	0.316306	0.286659	0.388321	0.365485	0.400641	0.364683	0.316607	0.55018	0.655449	0.619191	0.584836	0.51262	0.685196	0.75631	0.782252	0.72496	0.705028	0.952424	0.941206	0.947216	0.949219	0.968349	0.982472	0.976062	0.974459	0.982472	0.980569	0.998397	0.997296	0.997997	0.997196	0.998798	0.999399	0.9997	0.998898	0.999299	0.999199
ResNet18	DANN		0.46855	0.468049	0.477264	0.510517	0.511118	0.63131	0.651442	0.587139	0.542368	0.579227	0.763221	0.654447	0.698818	0.674079	0.654748	0.883213	0.872095	0.863982	0.934595	0.926182	0.971254	0.945613	0.959235	0.971054	0.979067	0.9999	0.9999	0.999399	0.999199	0.9998	0.9998	1	0.9997	0.9997	0.999099	1	0.9999	1	0.9999	1	1	1	1	1	1
ResNet18	BN-Adapt		0.347756	0.309095	0.286058	0.251903	0.370994	0.510016	0.523938	0.41877	0.309095	0.422476	0.385817	0.518229	0.436699	0.473858	0.483173	0.746294	0.710938	0.635417	0.820613	0.8128	0.748397	0.683594	0.854667	0.882212	0.779748	0.993289	0.965445	0.994391	0.995393	0.97516	0.999399	0.973257	0.995593	0.997396	0.998397	1	1	1	1	1	1	1	0.998998	1	1
ResNet18	JTT		0.404948	0.4375	0.454627	0.363882	0.399038	0.453325	0.511418	0.3753	0.412059	0.545773	0.644231	0.554487	0.46905	0.570513	0.490385	0.811498	0.756811	0.753906	0.89393	0.839744	0.912159	0.907452	0.914363	0.935196	0.904748	0.996595	0.997095	0.998297	0.994992	1	0.9997	1	0.999499	0.997897	0.999099	1	1	1	1	1	1	1	1	1	1
ResNet18	CycleGAN		0.944311	0.949319	0.966747	0.951422	0.990385	0.963942	0.989583	0.984175	0.992588	0.991186	0.995092	0.977163	0.988682	0.997997	0.996094	0.9997	0.9999	0.9999	0.9999	0.9998	1	1	0.9997	0.9998	0.9998	0.9998	1	0.9999	1	0.9999	1	1	1	0.9998	1	1	1	1	1	1	1	1	0.9998	1	0.9999
ResNet18	B-VAE		0.452023	0.418369	0.366086	0.386518	0.367388	0.426082	0.373998	0.380509	0.373998	0.419571	0.416567	0.45012	0.408253	0.455028	0.443009	0.576222	0.675481	0.514223	0.539363	0.479567	0.700721	0.684395	0.671174	0.728566	0.66246	0.966546	0.982171	0.957532	0.942408	0.96845	0.996895	0.998998	0.990885	0.99349	0.993189	1	1	0.9998	1	1	1	1	1	1	1
ResNet18	PreTrained on ImageNet		0.655349	0.865785	0.798478	0.647236	0.741587	0.927384	0.988782	0.840545	0.677784	0.778946	0.980068	0.992989	0.980268	0.855569	0.977764	1	1	0.9999	1	1	0.9997	1	1	0.9999	1	0.9999	0.9998	1	1	1	1	1	1	0.9999	0.9998	1	1	1	1	1	1	1	1	0.9999	1

## Sheet: SMALL_NORB
Unseen data shift			Results (Top 1 Accuracy):
Model	Algorithm	Seed:	1	2	3	4	5
ResNet18	ERM		0.637649	0.656622	0.662905	0.651744	0.643436
ResNet50	ERM		0.650959	0.644883	0.647941	0.644345	0.65997
ResNet101	ERM		0.627935	0.625413	0.63244	0.630539	0.628762
ViT	ERM		0.592675	0.587632	0.565807	0.592634	0.582672
MLP	ERM		0.56188	0.553034	0.544478	0.553406	0.557044
ResNet18	ERM+ImageNet Augm		0.65253	0.676629	0.670718	0.695891	0.686673
ResNet18	ERM+AugMix Augm		0.670346	0.63182	0.676546	0.686591	0.694403
ResNet18	ERM+RandAugment Augm		0.510995	0.531498	0.454985	0.627728	0.513145
ResNet18	ERM+AutoAugment Augm		0.640129	0.669726	0.611855	0.652199	0.655713
ResNet18	IRM		0.637235	0.62099	0.667121	0.648272	0.631324
ResNet18	CORAL		0.61202	0.633267	0.65902	0.660384	0.642898
ResNet18	MixUp		0.636326	0.655713	0.644304	0.627439	0.632234
ResNet18	SagNet		0.602348	0.608796	0.608383	0.583747	0.594287
ResNet18	DANN		0.637194	0.611731	0.658771	0.665551	0.640666
ResNet18	BN-Adapt		0.637649	0.656622	0.662905	0.651744	0.643436
ResNet18	JTT		0.632275	0.655382	0.659226	0.647073	0.635499
ResNet18	CycleGAN		0.61913	0.611442	0.63149	0.622727	0.622975
ResNet18	B-VAE		0.630415	0.645585	0.625992	0.633557	0.612599
ResNet18	PreTrained on ImageNet		0.75711	0.782118	0.779803	0.790881	0.775794
Low data shift		N:	1					5					10					50					100					500					1000					5000					10000
Model	Algorithm		1	2	3	4	5	1	2	3	4	5	1	2	3	4	5	1	2	3	4	5	1	2	3	4	5	1	2	3	4	5	1	2	3	4	5	1	2	3	4	5	1	2	3	4	5
ResNet18	ERM		0.607804	0.590112	0.57829	0.570933	0.625703	0.618097	0.625289	0.677703	0.617932	0.647239	0.627521	0.602265	0.659144	0.637235	0.630704	0.694114	0.711144	0.667824	0.679481	0.716931	0.725033	0.729663	0.761657	0.732887	0.728505	0.815104	0.800182	0.799396	0.818163	0.819858	0.83354	0.812128	0.80415	0.827712	0.840319	0.849868	0.860656	0.829737	0.827505	0.852513	0.852513	0.841229	0.837674	0.863591	0.836144
ResNet50	ERM		0.599289	0.571511	0.558408	0.549562	0.567378	0.615989	0.589534	0.626777	0.628638	0.648148	0.641741	0.6219	0.644263	0.641824	0.61078	0.667287	0.678034	0.669726	0.67452	0.670759	0.681217	0.691468	0.712715	0.70606	0.652488	0.757482	0.783771	0.765625	0.799769	0.794188	0.809193	0.783689	0.802869	0.79919	0.790881	0.850322	0.821015	0.837632	0.828084	0.817254	0.815642	0.83602	0.851811	0.83664	0.848669
ResNet101	ERM		0.606109	0.570188	0.575066	0.567915	0.576678	0.625703	0.580936	0.62438	0.652488	0.636533	0.628059	0.608259	0.627108	0.644469	0.626943	0.684524	0.645089	0.641865	0.672867	0.642816	0.69895	0.723504	0.695726	0.67018	0.662037	0.762029	0.770461	0.779638	0.768932	0.759714	0.824198	0.79981	0.784102	0.79981	0.81498	0.822503	0.817791	0.829572	0.829489	0.811632	0.812417	0.797867	0.826058	0.835565	0.832837
ViT	ERM		0.531333	0.59623	0.601687	0.602265	0.588004	0.583912	0.594783	0.590567	0.596892	0.573041	0.583623	0.591766	0.585979	0.590484	0.598338	0.626943	0.613095	0.612765	0.635086	0.60735	0.641162	0.65439	0.625083	0.66059	0.638393	0.717386	0.724206	0.715526	0.730985	0.717882	0.746734	0.765832	0.753224	0.755208	0.733052	0.786872	0.779679	0.803489	0.798528	0.799148	0.781291	0.793031	0.806548	0.803943	0.812128
MLP	ERM		0.51608	0.548446	0.537698	0.550595	0.525628	0.548156	0.549769	0.598504	0.56188	0.554605	0.570188	0.55816	0.583995	0.560557	0.550223	0.616567	0.62099	0.623347	0.596395	0.570188	0.645957	0.643064	0.61756	0.633763	0.647611	0.681465	0.673156	0.723338	0.709697	0.725198	0.73669	0.760293	0.718213	0.734044	0.745618	0.76083	0.763889	0.793981	0.795056	0.807457	0.782573	0.783234	0.803943	0.794643	0.804729
ResNet18	ERM+ImageNet Augm		0.639633	0.587384	0.604663	0.608218	0.609995	0.688079	0.688575	0.635375	0.649182	0.640294	0.670511	0.666749	0.701637	0.708416	0.671007	0.610491	0.662078	0.710193	0.739625	0.67204	0.721065	0.689195	0.720941	0.676918	0.687955	0.706556	0.747148	0.702009	0.751157	0.716311	0.758309	0.732184	0.744957	0.747768	0.760582	0.788442	0.799479	0.791997	0.76546	0.831928	0.810351	0.829241	0.830853	0.824115	0.821635
ResNet18	ERM+AugMix Augm		0.595651	0.58631	0.647445	0.645461	0.669023	0.654018	0.621156	0.65902	0.637235	0.597057	0.662078	0.685475	0.660053	0.621734	0.67204	0.673198	0.686673	0.650918	0.636285	0.668899	0.654266	0.698661	0.648851	0.672826	0.664187	0.709491	0.69246	0.67266	0.699446	0.741113	0.740327	0.745453	0.754382	0.744337	0.747065	0.779266	0.807002	0.798652	0.818494	0.805225	0.840939	0.864087	0.862682	0.821511	0.828249
ResNet18	ERM+RandAugment Augm		0.515956	0.444692	0.523024	0.524884	0.507027	0.541005	0.535425	0.459119	0.436673	0.549851	0.523065	0.531994	0.423859	0.51608	0.560268	0.511078	0.521205	0.516204	0.490617	0.475322	0.558656	0.544105	0.445726	0.52753	0.45978	0.504299	0.572586	0.572214	0.538649	0.569155	0.603547	0.54671	0.60334	0.610987	0.509879	0.667576	0.714575	0.724124	0.724537	0.750165	0.749876	0.786624	0.769924	0.815931	0.709491
ResNet18	ERM+AutoAugment Augm		0.552827	0.619585	0.557168	0.589658	0.622933	0.615038	0.646205	0.644263	0.581019	0.616319	0.604539	0.632523	0.618221	0.635169	0.61913	0.625455	0.60148	0.569651	0.623677	0.660549	0.636905	0.623057	0.613633	0.61789	0.617808	0.632647	0.705233	0.581804	0.67142	0.648479	0.70358	0.695478	0.69275	0.694899	0.737723	0.784888	0.777116	0.737351	0.748884	0.780713	0.829282	0.79919	0.813988	0.785218	0.824653
ResNet18	IRM		0.592799	0.602679	0.586682	0.572338	0.580605	0.623719	0.623057	0.659516	0.633598	0.645296	0.654473	0.615245	0.657159	0.629382	0.648975	0.715071	0.710152	0.687417	0.693452	0.726438	0.734788	0.73516	0.738095	0.746982	0.731936	0.81713	0.830233	0.808945	0.820974	0.812045	0.833623	0.819486	0.809028	0.82271	0.831639	0.858135	0.839244	0.838004	0.847966	0.851025	0.834325	0.837674	0.822917	0.84809	0.847264
ResNet18	CORAL		0.635127	0.616278	0.618014	0.624132	0.594618	0.594494	0.614335	0.626901	0.618345	0.602141	0.646329	0.60859	0.643891	0.624669	0.682126	0.718254	0.720031	0.707176	0.67452	0.713294	0.749669	0.765956	0.731233	0.743304	0.740162	0.807622	0.794188	0.823702	0.815228	0.802166	0.83602	0.834036	0.819568	0.818866	0.81651	0.84036	0.843213	0.850818	0.844825	0.865989	0.850653	0.852968	0.866361	0.841187	0.860243
ResNet18	MixUp		0.590319	0.59962	0.575562	0.548404	0.585855	0.60673	0.578993	0.592799	0.611442	0.633557	0.646784	0.597388	0.643477	0.63058	0.62748	0.67295	0.724537	0.691179	0.703745	0.697917	0.760375	0.756118	0.726852	0.731275	0.735904	0.808697	0.80568	0.808449	0.798652	0.808656	0.820354	0.845486	0.8187	0.811921	0.821181	0.821842	0.856771	0.84776	0.832217	0.855324	0.85086	0.870288	0.84375	0.84251	0.841725
ResNet18	SagNet		0.567212	0.578414	0.560185	0.480861	0.553365	0.606192	0.603712	0.582052	0.634135	0.559358	0.659681	0.602637	0.621734	0.661169	0.623099	0.623429	0.679357	0.695809	0.674231	0.682622	0.673694	0.741609	0.753514	0.703497	0.722718	0.786293	0.777612	0.815518	0.792948	0.806093	0.817832	0.811136	0.833829	0.810764	0.82085	0.849372	0.818494	0.846892	0.831969	0.838955	0.837963	0.86293	0.833127	0.81775	0.834119
ResNet18	DANN		0.623429	0.588666	0.623595	0.593667	0.585896	0.662905	0.628431	0.616567	0.60644	0.647569	0.642444	0.648148	0.66274	0.62252	0.640046	0.710689	0.744833	0.688947	0.686425	0.718957	0.749545	0.779927	0.748884	0.762525	0.725198	0.797206	0.790179	0.805514	0.809193	0.816551	0.803489	0.818742	0.818328	0.838831	0.813657	0.826844	0.866361	0.838252	0.828166	0.832259	0.85272	0.837591	0.833457	0.820312	0.875041
ResNet18	BN-Adapt		0.598338	0.577298	0.580026	0.583623	0.5854	0.615906	0.612599	0.651496	0.6083	0.645668	0.602885	0.621817	0.653977	0.624339	0.586268	0.690435	0.701058	0.709201	0.678158	0.699157	0.733424	0.739749	0.703001	0.715939	0.74814	0.81126	0.818163	0.791088	0.815021	0.812459	0.845114	0.845899	0.825562	0.81746	0.828993	0.846106	0.843874	0.855531	0.850074	0.858796	0.862227	0.858962	0.86417	0.849454	0.825893
ResNet18	JTT		0.583829	0.581556	0.586434	0.579365	0.563492	0.590071	0.57643	0.631283	0.635169	0.648934	0.629382	0.599785	0.627397	0.652116	0.656415	0.700521	0.71317	0.690683	0.703373	0.707631	0.740534	0.747355	0.749876	0.749008	0.737475	0.837302	0.820561	0.81312	0.809648	0.83292	0.809441	0.820685	0.802001	0.821966	0.818204	0.828497	0.853051	0.815104	0.821883	0.841683	0.843047	0.838831	0.845486	0.837467	0.83044
ResNet18	CycleGAN		0.584532	0.57209	0.604415	0.64418	0.582135	0.615203	0.635789	0.612558	0.61789	0.612434	0.623223	0.636987	0.616691	0.625289	0.580605	0.679853	0.698454	0.676422	0.663897	0.682705	0.726893	0.757068	0.696305	0.734788	0.726356	0.813368	0.791005	0.792948	0.7896	0.805762	0.804274	0.844122	0.795842	0.819279	0.828621	0.839244	0.834367	0.824157	0.84623	0.833788	0.85797	0.848504	0.852265	0.841559	0.860904
ResNet18	B-VAE		0.64265	0.64017	0.612351	0.64943	0.622313	0.671586	0.665344	0.6708	0.654018	0.682457	0.651579	0.633143	0.645833	0.649595	0.635913	0.683366	0.679563	0.699777	0.681713	0.679812	0.672908	0.736855	0.69709	0.721602	0.71536	0.784764	0.760086	0.804439	0.774182	0.793155	0.808862	0.802455	0.809482	0.819692	0.825066	0.828538	0.855365	0.857391	0.851811	0.843585	0.874463	0.868469	0.871114	0.863674	0.888186
ResNet18	PreTrained on ImageNet		0.704406	0.718543	0.67452	0.683573	0.698247	0.762401	0.704117	0.796834	0.747065	0.7562	0.750165	0.790427	0.812045	0.7729	0.794767	0.844825	0.81498	0.827257	0.839203	0.874091	0.862393	0.866402	0.887111	0.86975	0.863674	0.921999	0.92915	0.918444	0.884549	0.925265	0.888517	0.932829	0.875331	0.913112	0.828869	0.883515	0.85735	0.874835	0.863261	0.873719	0.862103	0.831804	0.866898	0.866361	0.848793
Spurious correlation		N:	1					5					10					50					100					500					1000					5000					10000
Model	Algorithm	Seed:	1	2	3	4	5	1	2	3	4	5	1	2	3	4	5	1	2	3	4	5	1	2	3	4	5	1	2	3	4	5	1	2	3	4	5	1	2	3	4	5	1	2	3	4	5
ResNet18	ERM		0.433738	0.409268	0.387814	0.413277	0.417369	0.477265	0.444982	0.438327	0.431093	0.414145	0.470031	0.445685	0.497768	0.511657	0.463252	0.547206	0.568742	0.542452	0.582631	0.538608	0.635251	0.671544	0.660962	0.676711	0.614253	0.821759	0.803985	0.813575	0.817915	0.808118	0.822958	0.816138	0.827588	0.816179	0.826761	0.852017	0.838211	0.841766	0.841683	0.860202	0.841311	0.849992	0.847884	0.83788	0.844577
ResNet50	ERM		0.436756	0.368552	0.366485	0.369337	0.365121	0.442626	0.40191	0.380291	0.422908	0.388352	0.440476	0.421792	0.456969	0.461599	0.409764	0.484747	0.49661	0.49628	0.552827	0.51703	0.601025	0.612434	0.628927	0.615038	0.591394	0.772693	0.804357	0.779597	0.775876	0.788484	0.821181	0.806217	0.792948	0.806258	0.798528	0.834987	0.844701	0.849537	0.832011	0.840939	0.805349	0.83664	0.855655	0.848545	0.818163
ResNet101	ERM		0.410301	0.389716	0.323743	0.370246	0.365699	0.434648	0.408317	0.384921	0.426505	0.422288	0.436343	0.394511	0.46226	0.477141	0.446553	0.50711	0.545676	0.505374	0.545718	0.49723	0.626571	0.6114	0.667411	0.591105	0.571098	0.795098	0.798322	0.760334	0.769097	0.73421	0.822255	0.800223	0.827133	0.820974	0.817667	0.83077	0.813161	0.862393	0.837756	0.85057	0.831267	0.847305	0.866113	0.849206	0.826141
ViT	ERM		0.455274	0.425223	0.447999	0.417865	0.478299	0.473545	0.462715	0.451968	0.439773	0.45081	0.484664	0.452381	0.463707	0.475777	0.477431	0.512235	0.506407	0.511905	0.531911	0.536293	0.543113	0.564856	0.545346	0.586434	0.558284	0.681837	0.689443	0.685433	0.665923	0.667535	0.717345	0.728505	0.708788	0.717262	0.72338	0.790509	0.783606	0.797164	0.793857	0.800802	0.794023	0.792163	0.798694	0.780093	0.789848
MLP	ERM		0.435061	0.451141	0.448537	0.459284	0.471313	0.478836	0.438616	0.445354	0.444527	0.469122	0.466229	0.488591	0.476976	0.479621	0.481895	0.525463	0.554439	0.511739	0.503059	0.496321	0.523934	0.546958	0.585193	0.569734	0.527778	0.645833	0.645048	0.659102	0.61665	0.655175	0.690972	0.695437	0.694568	0.668485	0.695933	0.759879	0.77815	0.768767	0.772611	0.769759	0.787285	0.790923	0.77476	0.78774	0.784474
ResNet18	ERM+ImageNet Augm		0.460565	0.448909	0.419271	0.477596	0.465608	0.448371	0.456308	0.48421	0.473752	0.474826	0.464244	0.489087	0.488757	0.447917	0.470486	0.463872	0.494874	0.477224	0.47648	0.463046	0.540799	0.501901	0.543816	0.51918	0.523107	0.613054	0.608548	0.603133	0.562996	0.617518	0.69957	0.675637	0.67233	0.674355	0.661748	0.768601	0.782118	0.749917	0.78559	0.770131	0.802001	0.822379	0.81498	0.815394	0.827629
ResNet18	ERM+AugMix Augm		0.42295	0.436632	0.435971	0.401538	0.469659	0.424893	0.430556	0.461144	0.446677	0.42171	0.465567	0.44895	0.456391	0.477348	0.428695	0.445519	0.483466	0.46503	0.489707	0.464947	0.489418	0.496114	0.469039	0.511822	0.510995	0.576141	0.604415	0.602348	0.617229	0.57548	0.666419	0.646577	0.634425	0.664187	0.64046	0.777778	0.814484	0.771743	0.805556	0.791915	0.832465	0.806754	0.806672	0.815766	0.818411
ResNet18	ERM+RandAugment Augm		0.332093	0.330729	0.350116	0.336723	0.36355	0.337508	0.311053	0.341973	0.347636	0.353175	0.319527	0.408069	0.378224	0.304605	0.366939	0.347305	0.355035	0.328084	0.352141	0.388558	0.407531	0.392526	0.35983	0.398148	0.357391	0.468254	0.420635	0.42977	0.456763	0.430308	0.490369	0.549727	0.432044	0.444692	0.486731	0.61231	0.661417	0.672743	0.602348	0.693948	0.733135	0.720279	0.735698	0.729993	0.722966
ResNet18	ERM+AutoAugment Augm		0.44833	0.448909	0.438905	0.448495	0.474289	0.450769	0.487103	0.477803	0.491981	0.445933	0.435557	0.516658	0.492353	0.512855	0.450438	0.464327	0.476687	0.469287	0.468254	0.487517	0.5396	0.487723	0.48516	0.485946	0.517981	0.55849	0.574942	0.599537	0.593709	0.583995	0.608011	0.625744	0.599496	0.613509	0.636781	0.714823	0.742394	0.739997	0.789765	0.708995	0.804315	0.803613	0.795139	0.77724	0.832755
ResNet18	IRM		0.425265	0.405919	0.397776	0.417163	0.445188	0.488054	0.456639	0.411872	0.48607	0.404803	0.476314	0.461268	0.499504	0.518353	0.483507	0.531994	0.578332	0.586227	0.600653	0.558532	0.641782	0.655547	0.671916	0.696677	0.647983	0.816923	0.831391	0.791171	0.790881	0.78621	0.826885	0.83974	0.821139	0.853464	0.834821	0.856605	0.849	0.841683	0.847636	0.874008	0.851397	0.850116	0.863343	0.838583	0.851108
ResNet18	CORAL		0.469949	0.413112	0.39666	0.425513	0.377687	0.46627	0.447173	0.423859	0.450686	0.405465	0.461764	0.438203	0.514468	0.494626	0.442915	0.523313	0.535962	0.522363	0.574818	0.552951	0.646123	0.66121	0.673363	0.6615	0.625579	0.816179	0.806093	0.806672	0.802869	0.787078	0.82891	0.837715	0.845527	0.826678	0.848173	0.840732	0.866361	0.866567	0.840154	0.855613	0.846892	0.854497	0.873429	0.868924	0.846065
ResNet18	MixUp		0.435061	0.425843	0.394139	0.384714	0.368262	0.464823	0.475157	0.394965	0.452092	0.40902	0.472925	0.449157	0.492766	0.486194	0.483879	0.521867	0.553241	0.5489	0.570643	0.568783	0.668527	0.65625	0.658317	0.692047	0.625496	0.799934	0.813285	0.800058	0.803943	0.800761	0.840567	0.839079	0.822999	0.857474	0.824033	0.845982	0.83631	0.850818	0.837632	0.862062	0.849454	0.852224	0.84437	0.852017	0.854663
ResNet18	SagNet		0.392196	0.339823	0.246197	0.357474	0.344659	0.460565	0.427455	0.378927	0.339988	0.38645	0.487723	0.486318	0.464244	0.469618	0.475736	0.563823	0.594411	0.575934	0.55849	0.596809	0.600198	0.714782	0.680308	0.667783	0.64141	0.763021	0.835193	0.800058	0.769387	0.768973	0.763476	0.848173	0.826224	0.855903	0.824942	0.831308	0.876653	0.860202	0.815807	0.851728	0.833416	0.848462	0.879919	0.865286	0.873801
ResNet18	DANN		0.459945	0.37161	0.410218	0.483094	0.441716	0.471023	0.483094	0.473338	0.501364	0.461723	0.475281	0.492188	0.509755	0.541915	0.519924	0.578952	0.616691	0.604332	0.661128	0.58693	0.675099	0.730944	0.678075	0.676505	0.641906	0.8125	0.803861	0.786541	0.804977	0.794312	0.83602	0.84003	0.826968	0.827257	0.80878	0.850901	0.838211	0.851769	0.825066	0.844411	0.841725	0.838004	0.834325	0.861855	0.858011
ResNet18	BN-Adapt		0.435805	0.418527	0.38397	0.415675	0.419354	0.458664	0.45081	0.408151	0.46999	0.380994	0.454117	0.445891	0.482226	0.487062	0.463914	0.532779	0.539517	0.541088	0.576596	0.559565	0.601687	0.647859	0.65563	0.669643	0.616195	0.807416	0.81994	0.79671	0.818783	0.809069	0.832796	0.847553	0.819486	0.855283	0.834243	0.843585	0.855035	0.840443	0.863715	0.827918	0.843171	0.853257	0.852348	0.82796	0.862062
ResNet18	JTT		0.567667	0.609582	0.600901	0.602059	0.601562	0.643643	0.66646	0.65687	0.624215	0.640625	0.649636	0.696801	0.635789	0.712426	0.64604	0.692254	0.70019	0.655506	0.720817	0.70668	0.72309	0.747975	0.70267	0.748471	0.718874	0.803034	0.783317	0.793775	0.793072	0.784474	0.81436	0.809069	0.837839	0.813533	0.794147	0.846809	0.843585	0.861607	0.818494	0.852761	0.848917	0.846147	0.854001	0.839079	0.870453
ResNet18	CycleGAN		0.567667	0.609582	0.600901	0.602059	0.601562	0.643643	0.66646	0.65687	0.624215	0.640625	0.649636	0.696801	0.635789	0.712426	0.64604	0.692254	0.70019	0.655506	0.720817	0.70668	0.72309	0.747975	0.70267	0.748471	0.718874	0.803034	0.783317	0.793775	0.793072	0.784474	0.81436	0.809069	0.837839	0.813533	0.794147	0.846809	0.843585	0.861607	0.818494	0.852761	0.848917	0.846147	0.854001	0.839079	0.870453
ResNet18	B-VAE		0.389798	0.353505	0.382895	0.427786	0.408565	0.412533	0.40439	0.356605	0.361111	0.349992	0.37624	0.373553	0.386409	0.405961	0.37252	0.411169	0.499297	0.479373	0.47185	0.449487	0.566303	0.54146	0.598669	0.560723	0.534226	0.732846	0.698289	0.724372	0.744172	0.767898	0.808862	0.772859	0.782035	0.777116	0.794188	0.839079	0.826141	0.831597	0.819775	0.82858	0.850157	0.841229	0.881696	0.835772	0.839286
ResNet18	PreTrained on ImageNet		0.442006	0.356233	0.40997	0.403853	0.425967	0.494378	0.479373	0.474413	0.553654	0.470362	0.516162	0.446387	0.572421	0.638062	0.541749	0.694072	0.705977	0.756531	0.761698	0.70296	0.82395	0.792039	0.864997	0.835235	0.777199	0.882854	0.919312	0.914435	0.889964	0.892774	0.928365	0.909598	0.908234	0.911417	0.907449	0.884797	0.875207	0.874793	0.880663	0.856523	0.877356	0.848958	0.878968	0.886615	0.888352

## Sheet: Camelyon
Unseen data shift			Results (Top 1 Accuracy): Report the best value using the OOD val set for each seed.
Model	Algorithm	Seed:	1	2	3	4	5
ResNet18	ERM		0.62593	0.639778	0.623035	0.680782	0.63093
ResNet50	ERM		0.649908	0.623259	0.621623	0.642002	0.637625
ResNet101	ERM		0.646814	0.662709	0.635683	0.651273	0.632389
ViT	ERM		0.681888	0.576454	0.572948	0.682864	0.562712
MLP	ERM		0.746859	0.562453	0.413204	0.556994	0.447195
ResNet50	ImageNet		0.635272	0.660356	0.668698	0.736105	0.707337
ResNet50	AugMix		0.682711	0.682558	0.700548	0.659827	0.68117
ResNet50	RandAugm		0.671981	0.667663	0.572619	0.65885	0.639119
ResNet50	AutoAugm		0.743646	0.659839	0.680782	0.659474	0.671287
ResNet50	IRM		0.639437	0.63939	0.649179	0.636236	0.637519
ResNet50	CORAL		0.627141	0.638107	0.636389	0.607234	0.633283
ResNet50	MixUp		0.633118	0.601186	0.635377	0.638213	0.624023
ResNet18	SagNet		0.665769	0.694901	0.66964	0.622317	0.653426
ResNet50	DANN		0.694089	0.723409	0.668439	0.683841	0.704231
ResNet50	BN-Adapt		0.615317	0.625812	0.649296	0.638037	0.628447
ResNet50	JTT		0.618799	0.598303	0.629589	0.637813	0.643884
ResNet50	CycleGAN		0.711549	0.693077	0.651555	0.707831	0.682547
ResNet50	B-VAE		0.556335	0.508248	0.77332	0.501094	0.577772
ResNet50	Pretrained		0.665616	0.684629	0.634766	0.650849	0.685265
Unseen data shift			Results (Top 1 Accuracy): Report the best value using the ID val set for each seed.
Model	Algorithm	Seed:	1	2	3	4	5
ResNet18	ERM		0.658062	0.664933	0.64139	0.663839	0.675875
ResNet50	ERM		0.635307	0.641037	0.650767	0.643884	0.634001
ResNet101	ERM		0.655473	0.636307	0.628259	0.650885	0.663192
ViT	ERM		0.581102	0.577043	0.557135	0.571183	0.555617
MLP	ERM		0.440806	0.426911	0.434864	0.450136	0.431605
ResNet50	ImageNet		0.72948	0.720527	0.695301	0.711596	0.707973
ResNet50	AugMix		0.713291	0.704137	0.701348	0.685041	0.689371
ResNet50	RandAugment		0.663662	0.64379	0.650979	0.651602	0.675087
ResNet50	AutoAugment		0.694242	0.70569	0.681652	0.6871	0.677946
ResNet50	IRM		0.644284	0.655921	0.650308	0.641696	0.639095
ResNet50	CORAL		0.639778	0.647214	0.650214	0.656144	0.650755
ResNet50	MixUp		0.628236	0.625529	0.631883	0.651402	0.629224
ResNet18	SagNet		0.650849	0.688194	0.668745	0.627894	0.683923
ResNet50	DANN		0.769414	0.703231	0.67284	0.67764	0.760107
ResNet50	BN-Adapt		0.61767	0.659203	0.649296	0.652167	0.664886
ResNet50	JTT		0.658085	0.700713	0.643731	0.626059	0.710714
ResNet50	CycleGAN		0.711549	0.661545	0.690853	0.707831	0.67957
ResNet50	B-VAE		0.640696	0.57296	0.52832	0.594856	0.582867
ResNet50	Pretrained		0.698219	0.693924	0.660462	0.704031	0.678664
Spurious correlation		N:	1					5					10					50					100					500					1000					5000					10000
Model	Algorithm	Seed:	1	2	3	4	5	1	2	3	4	5	1	2	3	4	5	1	2	3	4	5	1	2	3	4	5	1	2	3	4	5	1	2	3	4	5	1	2	3	4	5	1	2	3	4	5
ResNet18	ERM		0.960176	0.947336	0.933073	0.96272	0.953085	0.946875	0.958774	0.949339	0.962921	0.954667	0.952264	0.964203	0.960877	0.958474	0.957632	0.965465	0.96897	0.96881	0.971815	0.965104	0.967528	0.975461	0.974159	0.974539	0.970252	0.979087	0.977604	0.980048	0.979367	0.978205	0.98133	0.980369	0.981911	0.980829	0.98099	0.986298	0.986999	0.987099	0.987119	0.986558	0.988782	0.989724	0.989864	0.989884	0.988922
ResNet50	ERM		0.935236	0.940104	0.917568	0.942268	0.941486	0.949239	0.958093	0.94359	0.94972	0.948598	0.95605	0.963421	0.942788	0.952344	0.952624	0.964143	0.967909	0.968429	0.964583	0.960757	0.963582	0.967688	0.972877	0.974038	0.969912	0.978025	0.977224	0.978866	0.979768	0.977845	0.981611	0.981811	0.982933	0.982111	0.98097	0.98742	0.9878	0.988562	0.986859	0.988221	0.990405	0.990224	0.990905	0.991486	0.991006
ResNet101	ERM		0.94375	0.929567	0.925661	0.952464	0.945493	0.952664	0.959595	0.942608	0.950381	0.952264	0.959355	0.96226	0.943129	0.958934	0.954708	0.965325	0.967528	0.971655	0.970593	0.966266	0.971374	0.969852	0.971274	0.972576	0.974159	0.979247	0.980128	0.978486	0.979788	0.978866	0.981751	0.979948	0.983514	0.982352	0.98097	0.98778	0.988401	0.988522	0.98752	0.98764	0.990405	0.991086	0.990865	0.990725	0.990545
ViT	ERM		0.930308	0.927604	0.916667	0.928986	0.927925	0.933494	0.942448	0.938301	0.934014	0.931611	0.953826	0.950801	0.932272	0.946054	0.944932	0.955869	0.956891	0.956611	0.958153	0.95008	0.964343	0.959175	0.962079	0.961538	0.960116	0.969551	0.969251	0.968109	0.973498	0.967348	0.972997	0.973798	0.973437	0.97496	0.973057	0.980529	0.982392	0.98131	0.98125	0.981611	0.985517	0.986038	0.984776	0.984876	0.985116
MLP	ERM		0.865966	0.876683	0.869671	0.866486	0.852965	0.878966	0.880709	0.875841	0.880429	0.870913	0.882512	0.885056	0.88135	0.883534	0.885677	0.8874	0.891246	0.891787	0.889924	0.891687	0.888582	0.893049	0.892328	0.899599	0.893209	0.905228	0.905609	0.899279	0.903626	0.898698	0.90617	0.90627	0.905168	0.907913	0.907171	0.914944	0.919371	0.91853	0.914784	0.916006	0.918429	0.921434	0.917788	0.91887	0.919491
ResNet50	ImageNet		0.963381	0.920593	0.944331	0.92506	0.947155	0.956611	0.95645	0.954587	0.910978	0.951743	0.9625	0.963061	0.948718	0.956911	0.959956	0.959155	0.955329	0.96254	0.962941	0.962159	0.963462	0.967909	0.960236	0.96867	0.967007	0.966807	0.967568	0.972736	0.970132	0.970072	0.97476	0.973157	0.974018	0.971074	0.966466	0.975621	0.971254	0.974018	0.974659	0.973898	0.973538	0.973337	0.97484	0.971434	0.971695
ResNet50	AugMix		0.9122	0.928145	0.921915	0.9248	0.938261	0.932272	0.946855	0.936659	0.934095	0.928946	0.953786	0.949219	0.914683	0.931991	0.940785	0.951583	0.954948	0.9498	0.951122	0.95024	0.942788	0.955829	0.959215	0.959996	0.94405	0.968049	0.971755	0.967388	0.96849	0.971374	0.968029	0.9622	0.973357	0.970593	0.972576	0.972236	0.976643	0.978586	0.973638	0.977804	0.979046	0.977224	0.976903	0.97516	0.977524
ResNet50	RandAugm		0.90609	0.869371	0.857572	0.852524	0.886859	0.883113	0.892288	0.882272	0.859034	0.920753	0.91867	0.913882	0.889503	0.914844	0.922456	0.921374	0.92504	0.902063	0.919792	0.917388	0.921554	0.932933	0.91873	0.934776	0.918089	0.935697	0.936719	0.942107	0.931571	0.929147	0.940345	0.946154	0.925721	0.946094	0.939283	0.944832	0.951342	0.939343	0.946875	0.947035	0.952544	0.948057	0.948297	0.9503	0.951843
ResNet50	AutoAugm		0.905649	0.910577	0.938462	0.897576	0.930329	0.920393	0.951522	0.923978	0.897796	0.915084	0.933393	0.936699	0.926783	0.927524	0.931951	0.925501	0.95653	0.946715	0.948938	0.939503	0.952424	0.952404	0.951442	0.952504	0.945353	0.961138	0.959696	0.964343	0.960978	0.96224	0.961418	0.967388	0.966707	0.96242	0.960156	0.970373	0.971615	0.96873	0.967228	0.96875	0.968389	0.968069	0.972436	0.969331	0.967288
ResNet50	IRM		0.954667	0.938942	0.927304	0.955629	0.949639	0.954808	0.956851	0.951262	0.949319	0.954367	0.956931	0.965745	0.950962	0.961078	0.955248	0.964984	0.96903	0.966246	0.973538	0.967248	0.971194	0.975541	0.976322	0.97502	0.973057	0.979207	0.977764	0.979808	0.98127	0.980068	0.981911	0.98115	0.982252	0.983293	0.980569	0.987961	0.988081	0.988041	0.988141	0.9872	0.990685	0.991607	0.991506	0.991006	0.990264
ResNet50	CORAL		0.954367	0.925901	0.935757	0.958934	0.95026	0.952744	0.955208	0.946655	0.946194	0.951182	0.953285	0.957131	0.943289	0.952424	0.951482	0.958433	0.964804	0.964463	0.963862	0.958614	0.966226	0.969591	0.973638	0.972716	0.967829	0.977624	0.975841	0.978285	0.980509	0.978045	0.982151	0.979267	0.98101	0.981891	0.98141	0.988722	0.988462	0.988722	0.988401	0.988021	0.990966	0.990825	0.992087	0.991687	0.991126
ResNet50	MixUp		0.941206	0.926262	0.923317	0.946494	0.942788	0.951723	0.959976	0.942808	0.947676	0.948197	0.952825	0.967268	0.946695	0.953866	0.952885	0.964022	0.970713	0.965244	0.969671	0.961879	0.970473	0.971094	0.973097	0.974199	0.970473	0.980689	0.977644	0.979627	0.980829	0.978946	0.98145	0.980609	0.982011	0.982252	0.980429	0.987961	0.98736	0.988682	0.988161	0.98766	0.991266	0.992107	0.991286	0.990966	0.990986
ResNet18	SagNet		0.876002	0.845192	0.925681	0.872236	0.929387	0.938862	0.914403	0.936779	0.909615	0.878185	0.920192	0.944271	0.941727	0.96244	0.951863	0.949038	0.951122	0.963982	0.957171	0.967288	0.946875	0.959936	0.970513	0.957752	0.953045	0.9628	0.973237	0.976182	0.967027	0.972035	0.960797	0.978586	0.978906	0.975701	0.979387	0.981811	0.983033	0.987119	0.97528	0.9748	0.979447	0.988702	0.987821	0.977063	0.974319
ResNet50	DANN		0.958614	0.932953	0.923057	0.942688	0.95008	0.955308	0.964163	0.957031	0.951402	0.952544	0.962039	0.965845	0.958794	0.961478	0.958393	0.965425	0.972075	0.971875	0.971154	0.969872	0.971454	0.973137	0.9752	0.974579	0.971755	0.977945	0.978365	0.979567	0.98125	0.978385	0.982973	0.982091	0.983313	0.983333	0.98113	0.988922	0.987981	0.989103	0.988842	0.988642	0.991006	0.990905	0.990946	0.991306	0.990625
ResNet50	BN-Adapt		0.942488	0.913241	0.920373	0.940365	0.948818	0.942288	0.959956	0.946875	0.946875	0.945413	0.955168	0.961739	0.948257	0.947316	0.946154	0.952063	0.96855	0.971835	0.964984	0.960096	0.966767	0.968389	0.974099	0.974419	0.966286	0.978766	0.977183	0.977183	0.978466	0.975921	0.98117	0.980068	0.982352	0.982472	0.98131	0.987079	0.98762	0.988261	0.988582	0.988021	0.990304	0.990765	0.990545	0.991286	0.991747
ResNet50	JTT		0.934275	0.919611	0.926062	0.942568	0.945252	0.954107	0.957993	0.945152	0.947536	0.949619	0.953906	0.960196	0.950561	0.952885	0.952845	0.95629	0.965785	0.966747	0.965405	0.96234	0.965204	0.970873	0.973538	0.971895	0.965805	0.977224	0.976202	0.976723	0.980028	0.9753	0.980509	0.979167	0.979888	0.979447	0.979708	0.987019	0.98722	0.987099	0.985657	0.9877	0.990465	0.990425	0.989443	0.990545	0.990024
ResNet50	CycleGAN		0.95651	0.930008	0.96232	0.939223	0.965685	0.96228	0.955569	0.969892	0.956671	0.96901	0.967648	0.968049	0.973938	0.972075	0.973397	0.976002	0.97506	0.976863	0.975741	0.977885	0.977724	0.976623	0.978045	0.976522	0.979768	0.978626	0.977784	0.979327	0.978686	0.977784	0.981571	0.979587	0.980148	0.980669	0.979607	0.983954	0.985156	0.985617	0.983734	0.985016	0.985938	0.985677	0.987861	0.987941	0.986458
ResNet50	B-VAE		0.871294	0.898618	0.888021	0.875541	0.895933	0.887901	0.903005	0.875861	0.890124	0.89389	0.889724	0.900561	0.871394	0.894471	0.885938	0.896074	0.885016	0.90028	0.889042	0.88123	0.894331	0.884515	0.917708	0.932853	0.910477	0.92494	0.929828	0.914483	0.90645	0.922616	0.933293	0.933894	0.926062	0.916967	0.936198	0.942728	0.941767	0.960777	0.933654	0.942889	0.945673	0.952985	0.955769	0.945693	0.960717
ResNet50	Pretrained		0.971795	0.96276	0.96863	0.963582	0.96879	0.969071	0.977965	0.966767	0.96875	0.974219	0.976022	0.984075	0.969732	0.978866	0.974479	0.982732	0.985156	0.984115	0.985036	0.984956	0.983333	0.985857	0.985777	0.986138	0.985397	0.988041	0.988582	0.988241	0.988321	0.988622	0.989083	0.989283	0.989663	0.990184	0.989283	0.992248	0.992468	0.993189	0.993009	0.992989	0.99351	0.99389	0.99385	0.99397	0.994511
			1					5					10					50					100					500					1000					5000					10000
Model	Algorithm		1	2	3	4	5	1	2	3	4	5	1	2	3	4	5	1	2	3	4	5	1	2	3	4	5	1	2	3	4	5	1	2	3	4	5	1	2	3	4	5	1	2	3	4	5
ResNet18	ERM		0.708674	0.776663	0.69994	0.716747	0.765705	0.746514	0.703626	0.75006	0.782131	0.740745	0.733974	0.799119	0.780168	0.798277	0.726983	0.841466	0.821334	0.794131	0.815845	0.768289	0.819271	0.83746	0.821054	0.855809	0.83099	0.876803	0.892268	0.878686	0.883433	0.902564	0.909395	0.909215	0.895733	0.903566	0.914784	0.944331	0.941687	0.936819	0.945413	0.94379	0.953946	0.953666	0.952424	0.952865	0.950461
ResNet50	ERM		0.685136	0.767408	0.678405	0.733454	0.766266	0.714744	0.735256	0.74379	0.745593	0.717468	0.733393	0.750521	0.723998	0.805929	0.702644	0.769551	0.723878	0.771214	0.759455	0.769832	0.786999	0.792869	0.803626	0.815645	0.818369	0.877384	0.873277	0.883173	0.881571	0.881671	0.905469	0.900801	0.910477	0.905869	0.906991	0.942989	0.942849	0.935557	0.942167	0.946434	0.955188	0.955729	0.961038	0.954367	0.95599
ResNet101	ERM		0.692187	0.775681	0.684275	0.711278	0.712039	0.708153	0.71252	0.734876	0.778706	0.733694	0.761258	0.73764	0.744351	0.800581	0.709575	0.771875	0.75006	0.760016	0.78111	0.775381	0.822035	0.786018	0.79385	0.854487	0.857171	0.877544	0.869732	0.870192	0.878886	0.897796	0.897155	0.901883	0.899519	0.900321	0.925361	0.942628	0.945292	0.942187	0.942768	0.948417	0.954768	0.953425	0.959075	0.958594	0.955188
ViT	ERM		0.719351	0.709455	0.723478	0.728105	0.72508	0.735897	0.728165	0.734195	0.723357	0.720493	0.742668	0.728185	0.735216	0.737881	0.727644	0.765284	0.76222	0.735357	0.745673	0.735437	0.764663	0.811458	0.76877	0.785877	0.798397	0.819271	0.815224	0.852264	0.820353	0.853345	0.851623	0.873958	0.865545	0.878766	0.867688	0.918049	0.920974	0.914423	0.924459	0.910317	0.934355	0.928005	0.931631	0.935817	0.930889
MLP	ERM		0.695473	0.702183	0.728125	0.720994	0.677163	0.683654	0.721054	0.69351	0.719291	0.736919	0.672175	0.721014	0.69982	0.736038	0.699679	0.693049	0.68738	0.689603	0.697055	0.784736	0.739683	0.756571	0.744111	0.724479	0.726623	0.804267	0.811458	0.805749	0.783233	0.817087	0.826422	0.836639	0.829788	0.834936	0.830829	0.872736	0.8747	0.871655	0.870633	0.868429	0.887881	0.88746	0.891887	0.884956	0.884916
ResNet50	ImageNet		0.7249	0.7127	0.720753	0.734796	0.735116	0.71897	0.71871	0.722796	0.733433	0.717628	0.746254	0.711078	0.723478	0.730449	0.71236	0.720593	0.706871	0.718329	0.715004	0.725641	0.713582	0.730649	0.74403	0.717648	0.723878	0.767167	0.751342	0.729447	0.75018	0.772616	0.814103	0.813822	0.761118	0.816346	0.807472	0.888462	0.905769	0.892648	0.888101	0.880248	0.91853	0.918249	0.91849	0.917889	0.920052
ResNet50	AugMix		0.702985	0.761679	0.721194	0.688381	0.704207	0.719972	0.718109	0.74387	0.715445	0.714884	0.748538	0.736218	0.726623	0.774058	0.723037	0.723978	0.74986	0.733273	0.732692	0.73726	0.741647	0.765144	0.747556	0.734575	0.770974	0.810978	0.799439	0.790264	0.788361	0.823698	0.840505	0.866987	0.838642	0.840385	0.828786	0.902063	0.892067	0.909555	0.898277	0.896074	0.926743	0.927204	0.919972	0.934375	0.914042
ResNet50	RandAugm		0.708253	0.784014	0.698217	0.734736	0.702624	0.722095	0.770373	0.779888	0.759796	0.719591	0.752764	0.744972	0.748117	0.79361	0.712901	0.729587	0.734976	0.746134	0.736799	0.758894	0.748978	0.741446	0.763261	0.742268	0.743029	0.764984	0.754667	0.752083	0.753125	0.780489	0.784736	0.777123	0.797917	0.778806	0.7622	0.864804	0.865545	0.839163	0.850741	0.83147	0.863922	0.865725	0.865625	0.87526	0.878145
ResNet50	AutoAugm		0.705689	0.765986	0.700521	0.690425	0.713882	0.689443	0.706831	0.733654	0.723337	0.703405	0.710096	0.712139	0.689383	0.759054	0.70641	0.723478	0.728966	0.713201	0.74363	0.706891	0.728105	0.727524	0.753546	0.750321	0.719411	0.801522	0.797055	0.778846	0.795353	0.761819	0.834796	0.849058	0.816526	0.857833	0.827584	0.890425	0.892067	0.898177	0.890525	0.876302	0.915785	0.897476	0.919351	0.927424	0.902484
ResNet50	IRM		0.732792	0.792288	0.753986	0.777444	0.757111	0.736218	0.741907	0.759595	0.787099	0.735176	0.788662	0.741707	0.789083	0.843289	0.738101	0.843029	0.792007	0.807212	0.811959	0.797095	0.813642	0.810397	0.840905	0.852804	0.846915	0.901362	0.898237	0.889824	0.883353	0.894752	0.9127	0.907732	0.902925	0.909956	0.917508	0.943269	0.949219	0.953486	0.953526	0.940024	0.957672	0.95639	0.960978	0.959455	0.959415
ResNet50	CORAL		0.696074	0.792188	0.718069	0.729968	0.746554	0.719511	0.745553	0.757993	0.813602	0.716166	0.755068	0.745112	0.77498	0.805108	0.722857	0.818389	0.738802	0.810156	0.802664	0.770853	0.827244	0.821314	0.816206	0.843109	0.822736	0.879327	0.874359	0.884155	0.892648	0.88748	0.904968	0.907993	0.90024	0.900921	0.91274	0.937019	0.94393	0.940665	0.944792	0.942087	0.951402	0.95607	0.957993	0.957111	0.957151
ResNet50	MixUp		0.694551	0.774299	0.684696	0.703886	0.743229	0.720994	0.716486	0.735096	0.773898	0.730669	0.742788	0.695232	0.741647	0.815885	0.722937	0.797616	0.74399	0.766947	0.777424	0.758834	0.781991	0.775421	0.793209	0.830208	0.807632	0.869311	0.870012	0.87484	0.884395	0.884736	0.898397	0.895353	0.896154	0.895072	0.917788	0.945974	0.940685	0.944211	0.944071	0.940224	0.955869	0.955709	0.959675	0.959235	0.957071
ResNet18	SagNet		0.738462	0.773237	0.702825	0.71881	0.7499	0.816206	0.766927	0.833774	0.808974	0.740865	0.85617	0.84357	0.800901	0.827564	0.761899	0.871995	0.872997	0.825661	0.845172	0.856791	0.877204	0.897877	0.886198	0.877544	0.882332	0.90617	0.917508	0.907071	0.921935	0.910357	0.923057	0.920292	0.927204	0.920573	0.920513	0.942869	0.947135	0.940525	0.948958	0.94361	0.953125	0.952865	0.957812	0.952945	0.952143
ResNet50	DANN		0.745453	0.809696	0.698357	0.816867	0.765485	0.810216	0.787961	0.795353	0.803686	0.748858	0.847135	0.81883	0.839263	0.836839	0.745252	0.82508	0.845012	0.859375	0.863922	0.846995	0.838361	0.849539	0.861558	0.878706	0.859135	0.90621	0.896695	0.904868	0.920353	0.901482	0.919071	0.917708	0.913802	0.923558	0.914423	0.947977	0.947075	0.948918	0.949339	0.948538	0.955549	0.955529	0.960577	0.960276	0.958694
ResNet50	BN-Adapt		0.700741	0.778846	0.671454	0.723998	0.715925	0.722356	0.715785	0.758554	0.751923	0.714443	0.743269	0.72504	0.758173	0.794111	0.711278	0.786639	0.781891	0.755008	0.753806	0.75026	0.783694	0.77508	0.779848	0.76871	0.761138	0.852684	0.8624	0.849179	0.848157	0.863562	0.894671	0.898698	0.864904	0.896114	0.885076	0.940204	0.938862	0.937921	0.936478	0.935497	0.953786	0.95008	0.955128	0.952885	0.956731
ResNet50	JTT		0.723197	0.770032	0.695553	0.710096	0.755429	0.716747	0.709155	0.724079	0.749319	0.717007	0.719471	0.715966	0.747496	0.80653	0.714203	0.798818	0.764944	0.797536	0.786899	0.807853	0.784235	0.802244	0.8002	0.839643	0.822216	0.887941	0.886118	0.860637	0.861879	0.88726	0.902764	0.900942	0.883393	0.905108	0.900821	0.940525	0.944812	0.945052	0.947516	0.946014	0.957632	0.952724	0.955268	0.953926	0.957392
ResNet50	CycleGAN		0.876843	0.892348	0.849179	0.859736	0.843209	0.872877	0.904868	0.905228	0.905148	0.88109	0.904567	0.904387	0.898117	0.909615	0.900701	0.923578	0.920333	0.909796	0.909956	0.903546	0.898858	0.908894	0.91272	0.91895	0.898037	0.92524	0.915485	0.92486	0.914944	0.915885	0.928265	0.926022	0.922897	0.929267	0.92502	0.947376	0.948978	0.946895	0.949179	0.944251	0.954948	0.954788	0.957913	0.957472	0.955629
ResNet50	B-VAE		0.701242	0.709756	0.695853	0.703766	0.693409	0.680429	0.700561	0.705569	0.676683	0.701983	0.68101	0.686258	0.709976	0.69389	0.71881	0.717388	0.70014	0.698017	0.749239	0.716927	0.745272	0.682712	0.714443	0.75016	0.734535	0.747135	0.740465	0.777845	0.798998	0.755729	0.745913	0.775641	0.79379	0.780789	0.777564	0.842468	0.832392	0.868429	0.860557	0.847476	0.845313	0.85643	0.890405	0.878766	0.861438
ResNet50	Pretrained		0.715024	0.796434	0.714824	0.715805	0.721174	0.733173	0.73123	0.732372	0.75008	0.716627	0.79379	0.754768	0.786198	0.804046	0.727063	0.84385	0.785437	0.769792	0.802905	0.802925	0.838662	0.856751	0.848458	0.856671	0.859495	0.897877	0.907913	0.892588	0.898998	0.889663	0.928225	0.917047	0.912921	0.914944	0.901262	0.951362	0.956871	0.950541	0.954988	0.949299	0.964864	0.963301	0.964924	0.963482	0.964683

## Sheet: iWildCam
Unseen data shift			Results (Top 1 Accuracy): Report the best value using the OOD val set for each seed.
			Out of distribution test set					In distribution test set
Model	Algorithm	Seed:	1	2	3	4	5	1	2	3	4	5
ResNet18	ERM		0.292506	0.297389	0.304328	0.29099	0.284899	0.584144	0.578253	0.602843	0.586706	0.557889
ResNet50	ERM		0.307669	0.313502	0.306923	0.315507	0.317254	0.614882	0.615779	0.607454	0.609247	0.612961
ResNet101	ERM		0.303994	0.311806	0.307412	0.304996	0.316663	0.61168	0.605277	0.602843	0.60041	0.613473
ViT	ERM		0.343904	0.344598	0.345806	0.344572	0.345755	0.650231	0.650102	0.651255	0.651127	0.650231
MLP	ERM		0.354441	0.349892	0.326814	0.325067	0.311755	0.533299	0.534452	0.590932	0.584016	0.594647
ResNet50	ERM+ImageNet Augm		0.299085	0.292352	0.295641	0.302683	0.300447	0.464652	0.488858	0.454534	0.491547	0.47208
ResNet50	ERM+AugMix Augm		0.304636	0.312012	0.306666	0.314556	0.309622	0.471824	0.527024	0.4927	0.516778	0.541496
ResNet50	ERM+RandAugment Augm		0.295847	0.300576	0.288806	0.302554	0.294048	0.485015	0.452997	0.48271	0.476562	0.458632
ResNet50	ERM+AutoAugment Augm		0.29744	0.294202	0.309262	0.313631	0.307566	0.451716	0.487193	0.482838	0.501793	0.48873
ResNet50	IRM		0.311832	0.315327	0.314273	0.312577	0.305664	0.613601	0.605405	0.618468	0.602971	0.599513
ResNet50	CORAL		0.332391	0.337891	0.310136	0.321392	0.321546	0.628458	0.630763	0.623463	0.636014	0.632556
ResNet50	MixUp		0.308285	0.320133	0.30736	0.301886	0.310778	0.609631	0.611808	0.611296	0.609119	0.623719
ResNet18	SagNet		0.265471	0.265548	0.261153	0.262901	0.262901	0.370261	0.365907	0.370517	0.372567	0.372567
ResNet50	DANN		0.307103	0.316509	0.306229	0.312577	0.321546	0.608094	0.613858	0.593622	0.622567	0.601306
ResNet50	BN-Adapt		0.314582	0.316175	0.304199	0.31268	0.315738	0.618852	0.608735	0.587859	0.601819	0.610912
ResNet50	JTT		0.300164	0.3033	0.307926	0.313425	0.303248	0.585938	0.602075	0.605789	0.59106	0.609119
ResNet50	CycleGAN		0.318873	0.302914	0.310958	0.320441	0.308979	0.632556	0.599898	0.629867	0.632556	0.622695
ResNet50	B-VAE		0.31525	0.320595	0.292326	0.284642	0.295487	0.574923	0.586706	0.587346	0.594006	0.553151
ResNet50	PreTrained on ImageNet		0.312397	0.312397	0.312397	0.312397	0.312397	0.568007	0.568007	0.568007	0.568007	0.568007
Unseen data shift			Results (Top 1 Accuracy): Report the best value using the ID val set for each seed.
			Out of distribution test set					In distribution test set
Model	Algorithm	Seed:	1	2	3	4	5	1	2	3	4	5
ResNet18	ERM		0.297517	0.300781	0.298648	0.289217	0.286929	0.608222	0.602971	0.606045	0.600922	0.602075
ResNet50	ERM		0.304739	0.310521	0.318488	0.298777	0.305356	0.616419	0.6177	0.623975	0.612577	0.620261
ResNet101	ERM		0.307412	0.308697	0.312603	0.305201	0.311215	0.616931	0.623335	0.616547	0.612577	0.615394
ViT	ERM		0.345266	0.341283	0.349121	0.342028	0.338841	0.654073	0.653432	0.652024	0.652408	0.649206
MLP	ERM		0.341077	0.32869	0.306872	0.317897	0.329641	0.645876	0.646901	0.646132	0.641906	0.646388
ResNet50	ERM+ImageNet Augm		0.30258	0.290707	0.295462	0.298391	0.293251	0.495005	0.483735	0.492572	0.504355	0.501665
ResNet50	ERM+AugMix Augm		0.30461	0.311138	0.315892	0.314607	0.307694	0.528176	0.547131	0.531378	0.537398	0.536629
ResNet50	ERM+RandAugment Augm		0.289885	0.291658	0.301475	0.297132	0.297877	0.488601	0.486296	0.495902	0.502305	0.497439
ResNet50	ERM+AutoAugment Augm		0.313579	0.289294	0.29798	0.300987	0.302554	0.509477	0.490523	0.508581	0.502946	0.49603
ResNet50	IRM		0.307746	0.302709	0.317177	0.303017	0.322034	0.621158	0.619109	0.623463	0.615394	0.626153
ResNet50	CORAL		0.323602	0.319336	0.319619	0.329538	0.314633	0.640753	0.636527	0.6396	0.639857	0.640625
ResNet50	MixUp		0.308619	0.311446	0.316612	0.309236	0.311909	0.616931	0.622951	0.619493	0.62231	0.623207
ResNet18	SagNet		0.261976	0.254343	0.263646	0.264006	0.26398	0.388192	0.371798	0.380123	0.383837	0.378714
ResNet50	DANN		0.309339	0.308851	0.313631	0.307489	0.302734	0.615779	0.621158	0.622695	0.622567	0.622567
ResNet50	BN-Adapt		0.312166	0.303377	0.314762	0.305921	0.321032	0.616291	0.618981	0.616675	0.619621	0.620774
ResNet50	JTT		0.305741	0.310727	0.305921	0.309236	0.312012	0.612321	0.607326	0.6104	0.614754	0.61501
ResNet50	CycleGAN		0.308105	0.328253	0.31268	0.314248	0.30587	0.629098	0.633709	0.628074	0.635118	0.631916
ResNet50	B-VAE		0.294254	0.308568	0.279862	0.288497	0.25203	0.620389	0.62167	0.622439	0.619621	0.614882
ResNet50	PreTrained on ImageNet		0.323088	0.323088	0.316895	0.323088	0.323088	0.629739	0.629739	0.633581	0.629739	0.629739
Low data shift		N:	1					5					10					50					100					500					1000					5000					10000
Model	Algorithm		1	2	3	4	5	1	2	3	4	5	1	2	3	4	5	1	2	3	4	5	1	2	3	4	5	1	2	3	4	5	1	2	3	4	5	1	2	3	4	5	1	2	3	4	5
ResNet18	ERM		0.575681	0.580569	0.588482	0.561819	0.591286	0.590605	0.590725	0.593369	0.592368	0.589223	0.590485	0.592808	0.592808	0.592869	0.59381	0.595112	0.594231	0.593149	0.59377	0.593349	0.596995	0.595994	0.595753	0.598397	0.597696	0.603686	0.603926	0.603926	0.606811	0.604026	0.612179	0.61264	0.611318	0.614323	0.610757	0.629988	0.63133	0.630769	0.630389	0.63097	0.638462	0.638462	0.638522	0.6378	0.638622
ResNet50	ERM		0.569631	0.580148	0.585337	0.541567	0.588281	0.58764	0.589323	0.589964	0.588742	0.591687	0.590905	0.588922	0.589323	0.591707	0.590545	0.592889	0.593289	0.59347	0.59351	0.59351	0.595813	0.596334	0.596635	0.596975	0.59371	0.606991	0.60607	0.602624	0.607071	0.602945	0.61262	0.613021	0.610457	0.612179	0.611058	0.633073	0.632392	0.631811	0.630909	0.630629	0.639844	0.639884	0.640425	0.639804	0.639143
ResNet101	ERM		0.572416	0.572316	0.585717	0.536438	0.589944	0.588442	0.586739	0.588442	0.589744	0.586719	0.592127	0.591066	0.590645	0.591346	0.589243	0.592568	0.595513	0.593209	0.594191	0.591747	0.596214	0.596474	0.597336	0.595773	0.592588	0.605228	0.603666	0.605349	0.606791	0.603566	0.613041	0.613101	0.610737	0.613862	0.610116	0.630669	0.63113	0.631971	0.632212	0.63147	0.639643	0.639163	0.639744	0.638161	0.638942
ViT	ERM		0.585677	0.585497	0.58754	0.586959	0.588762	0.586859	0.586438	0.588041	0.5877	0.586999	0.586558	0.586318	0.587159	0.589683	0.585978	0.589623	0.590966	0.588902	0.591627	0.586919	0.593089	0.594832	0.591847	0.592608	0.590865	0.601863	0.600701	0.598618	0.602304	0.600501	0.607111	0.610597	0.60645	0.608834	0.605549	0.626883	0.628726	0.627103	0.627023	0.626482	0.636038	0.635998	0.63724	0.63734	0.636739
MLP	ERM		0.572917	0.574359	0.576983	0.573558	0.578786	0.5747	0.572416	0.576623	0.572696	0.574319	0.576102	0.577644	0.574139	0.575641	0.577424	0.578425	0.578446	0.578746	0.577284	0.578305	0.580288	0.580749	0.581611	0.582312	0.578205	0.594511	0.592408	0.592268	0.592488	0.588462	0.600962	0.601482	0.60026	0.602644	0.59996	0.619892	0.621875	0.619491	0.620212	0.619832	0.628866	0.627344	0.628926	0.626943	0.628466
ResNet50	ERM+ImageNet Augm		0.546014	0.525921	0.553786	0.508293	0.561719	0.564243	0.566807	0.563041	0.56903	0.569291	0.565084	0.570513	0.579748	0.574018	0.571514	0.58151	0.58105	0.580268	0.583834	0.579908	0.586619	0.582572	0.580829	0.583914	0.581931	0.587039	0.586939	0.583954	0.589143	0.583393	0.588882	0.586518	0.588622	0.590986	0.587079	0.598778	0.594752	0.598878	0.596194	0.59345	0.606571	0.604227	0.606891	0.608413	0.59976
ResNet50	ERM+AugMix Augm		0.558153	0.540425	0.571394	0.523918	0.563181	0.575841	0.576603	0.579708	0.572075	0.570893	0.577865	0.579046	0.581971	0.576983	0.579467	0.584175	0.585096	0.585457	0.586378	0.589403	0.588702	0.591967	0.586819	0.589503	0.589663	0.594631	0.594491	0.592849	0.591086	0.591486	0.597296	0.588662	0.590685	0.595513	0.596554	0.602845	0.610377	0.596835	0.607392	0.605569	0.609215	0.611999	0.613241	0.610276	0.603145
ResNet50	ERM+RandAugment Augm		0.553105	0.505168	0.563862	0.498898	0.564984	0.56232	0.569932	0.557232	0.569511	0.565124	0.565124	0.570693	0.572236	0.569852	0.565785	0.576362	0.583033	0.577404	0.575861	0.579667	0.580308	0.581751	0.580389	0.583894	0.578846	0.586779	0.588321	0.583894	0.585677	0.5874	0.587861	0.590966	0.589944	0.590825	0.58768	0.594531	0.59357	0.596875	0.594511	0.590545	0.598818	0.595553	0.596134	0.596595	0.59393
ResNet50	ERM+AutoAugment Augm		0.563922	0.528325	0.558814	0.511418	0.553866	0.567889	0.567047	0.56869	0.566106	0.562099	0.569732	0.571274	0.579087	0.567728	0.567889	0.578305	0.579347	0.580048	0.578365	0.580609	0.58121	0.586939	0.588241	0.582512	0.584956	0.585797	0.58724	0.588502	0.590966	0.590004	0.588201	0.58728	0.59395	0.591687	0.588562	0.588782	0.594431	0.591947	0.595893	0.592588	0.598858	0.594491	0.596514	0.596735	0.600661
ResNet50	IRM		0.564784	0.580589	0.585897	0.546114	0.590084	0.590845	0.589203	0.591546	0.589042	0.588742	0.592328	0.590024	0.590044	0.591266	0.592688	0.595653	0.596975	0.594932	0.595994	0.592728	0.595813	0.596534	0.595313	0.595633	0.593009	0.607151	0.606971	0.604267	0.605529	0.602764	0.613662	0.61234	0.610517	0.612099	0.612179	0.630128	0.632412	0.63121	0.630569	0.630689	0.639944	0.639243	0.639543	0.639223	0.639583
ResNet50	CORAL		0.573538	0.591286	0.589724	0.571034	0.589403	0.589683	0.593349	0.593269	0.591767	0.591587	0.590986	0.589804	0.591206	0.591907	0.591546	0.593189	0.593329	0.592728	0.595012	0.59349	0.595653	0.5997	0.596695	0.598538	0.594972	0.605669	0.606691	0.606731	0.606711	0.602744	0.613482	0.615124	0.610737	0.61278	0.610537	0.63129	0.632933	0.631591	0.629287	0.63105	0.640445	0.639303	0.640104	0.639383	0.640465
ResNet50	MixUp		0.586679	0.586218	0.5876	0.586178	0.588081	0.591206	0.588922	0.586679	0.586779	0.58726	0.589403	0.585617	0.586218	0.587821	0.585697	0.592808	0.591827	0.58766	0.594071	0.588822	0.592228	0.594551	0.594071	0.594591	0.589543	0.604667	0.607993	0.600321	0.604307	0.601923	0.613021	0.613662	0.607312	0.61238	0.608413	0.630929	0.630909	0.629547	0.630228	0.629888	0.638502	0.636318	0.639303	0.63768	0.639563
ResNet18	SagNet		0.355849	0.367548	0.36236	0.375	0.361579	0.397997	0.367208	0.402744	0.379728	0.452284	0.393029	0.42528	0.436839	0.410617	0.41905	0.451382	0.438782	0.457272	0.425341	0.448057	0.454627	0.465966	0.467588	0.453986	0.459435	0.482031	0.485377	0.477284	0.48135	0.485737	0.489844	0.485497	0.478846	0.490625	0.486038	0.501482	0.495132	0.489563	0.498217	0.488822	0.49405	0.497075	0.501723	0.495292	0.509455
ResNet50	DANN		0.56901	0.588021	0.585757	0.548498	0.590565	0.589603	0.590665	0.590345	0.590905	0.590565	0.591827	0.590044	0.590845	0.589683	0.591887	0.594211	0.595353	0.59379	0.593349	0.591206	0.595913	0.596955	0.596374	0.597536	0.595933	0.606771	0.607091	0.605409	0.605709	0.604828	0.612961	0.613041	0.609635	0.613702	0.611779	0.630208	0.632752	0.63127	0.630789	0.630629	0.640585	0.639503	0.640004	0.638301	0.640024
ResNet50	BN-Adapt		0.571094	0.576222	0.584115	0.542568	0.589543	0.588842	0.588722	0.588942	0.589343	0.590304	0.589243	0.589383	0.59345	0.591807	0.588462	0.591807	0.59351	0.593309	0.597055	0.591006	0.594992	0.596675	0.596775	0.595112	0.592548	0.605389	0.605188	0.603726	0.60639	0.602825	0.613401	0.613502	0.610337	0.613622	0.610256	0.630889	0.632171	0.630429	0.629708	0.630889	0.639844	0.639183	0.638181	0.639143	0.639603
ResNet50	JTT		0.565084	0.571935	0.58109	0.522296	0.585597	0.58754	0.58752	0.589924	0.589343	0.589363	0.592488	0.586639	0.586478	0.588562	0.590204	0.591827	0.591727	0.590765	0.591667	0.589022	0.593349	0.595353	0.595693	0.596194	0.59373	0.604087	0.603766	0.602003	0.60613	0.602224	0.609956	0.612099	0.608974	0.611558	0.611999	0.629367	0.63131	0.630709	0.628606	0.629888	0.639323	0.638562	0.638041	0.637941	0.637821
ResNet50	CycleGAN		0.582031	0.551082	0.58131	0.551122	0.582993	0.581591	0.584916	0.582151	0.584355	0.583313	0.582512	0.584255	0.583293	0.585317	0.584315	0.586639	0.588962	0.586579	0.585497	0.584054	0.586719	0.586899	0.588702	0.586879	0.586458	0.597596	0.597877	0.596214	0.598818	0.596775	0.60599	0.607492	0.602945	0.604607	0.603746	0.62476	0.62474	0.6248	0.623437	0.623678	0.631671	0.63133	0.634355	0.631651	0.634595
ResNet50	B-VAE		0.527945	0.547857	0.550881	0.549599	0.549119	0.536318	0.552965	0.553105	0.548438	0.545513	0.545353	0.541707	0.551723	0.547456	0.552504	0.549058	0.557893	0.554868	0.546955	0.552584	0.545312	0.558794	0.556811	0.554227	0.552544	0.557652	0.570112	0.571795	0.570593	0.563762	0.564083	0.576643	0.569732	0.576583	0.57484	0.579968	0.596675	0.597396	0.597316	0.599099	0.59345	0.60653	0.604527	0.602504	0.604507
ResNet50	PreTrained on ImageNet		0.601002	0.6003	0.607953	0.591687	0.604587	0.610897	0.6125	0.611358	0.611799	0.610998	0.612941	0.61262	0.612179	0.61278	0.614623	0.615605	0.615966	0.614223	0.613702	0.614083	0.615966	0.616406	0.614704	0.614383	0.613021	0.620693	0.621114	0.619571	0.621294	0.619712	0.623778	0.6247	0.622416	0.623357	0.621494	0.636238	0.636739	0.636418	0.636318	0.636979	0.642268	0.641987	0.642528	0.640645	0.641747
Spurious correlation		N:	1					5					10					50					100					500					1000					5000					10000
Model	Algorithm	Seed:	1	2	3	4	5	1	2	3	4	5	1	2	3	4	5	1	2	3	4	5	1	2	3	4	5	1	2	3	4	5	1	2	3	4	5	1	2	3	4	5	1	2	3	4	5
ResNet18	ERM		0.322356	0.317087	0.275821	0.419531	0.414683	0.394311	0.38151	0.404006	0.413742	0.380729	0.382192	0.371374	0.388221	0.379808	0.369131	0.38107	0.383313	0.409175	0.383293	0.40655	0.398838	0.397596	0.41859	0.405489	0.408273	0.427244	0.428285	0.436799	0.433494	0.443029	0.453325	0.45623	0.455649	0.451322	0.452985	0.509475	0.509796	0.51234	0.509776	0.5127	0.543289	0.541526	0.538642	0.542188	0.540946
ResNet50	ERM		0.331631	0.282873	0.275841	0.417468	0.401963	0.385637	0.363261	0.385296	0.408834	0.395152	0.356871	0.366887	0.397155	0.358313	0.372296	0.377003	0.341126	0.397336	0.366667	0.395513	0.403946	0.377324	0.407893	0.392268	0.394892	0.428686	0.433754	0.445573	0.432532	0.429667	0.446655	0.453165	0.458734	0.454888	0.449439	0.511438	0.510857	0.5122	0.513001	0.51276	0.544792	0.542087	0.540966	0.543169	0.544111
ResNet101	ERM		0.314503	0.299159	0.25641	0.421034	0.399679	0.39397	0.348257	0.390084	0.411298	0.398838	0.352404	0.360036	0.398898	0.370873	0.366486	0.380829	0.359355	0.40655	0.377003	0.407252	0.403826	0.379107	0.413942	0.403906	0.398157	0.43097	0.426042	0.435537	0.427063	0.433734	0.449559	0.447917	0.460256	0.454067	0.449079	0.511779	0.509856	0.512821	0.511098	0.511258	0.545333	0.545012	0.543309	0.54361	0.543169
ViT	ERM		0.240024	0.288141	0.28137	0.245633	0.270272	0.240685	0.268069	0.207732	0.185236	0.199279	0.277324	0.25014	0.271755	0.270693	0.295232	0.324199	0.315445	0.347596	0.322616	0.319531	0.354728	0.322175	0.309335	0.351442	0.34982	0.422636	0.415064	0.420974	0.399519	0.417648	0.447216	0.444131	0.440885	0.444131	0.440885	0.508053	0.496174	0.503345	0.507552	0.507332	0.534395	0.536699	0.535056	0.538582	0.535717
MLP	ERM		0.357893	0.41242	0.384375	0.420032	0.397396	0.401923	0.410537	0.408273	0.393269	0.388401	0.410557	0.416426	0.351062	0.423417	0.370032	0.41276	0.426563	0.422095	0.406651	0.410256	0.421895	0.420192	0.419752	0.423958	0.420613	0.438321	0.434195	0.442047	0.439864	0.43758	0.453626	0.454247	0.458514	0.453265	0.454567	0.511639	0.508834	0.509956	0.51238	0.509315	0.53764	0.538381	0.536739	0.539503	0.538281
ResNet50	ERM+ImageNet Augm		0.2875	0.294331	0.301563	0.40637	0.397957	0.368189	0.376903	0.367388	0.392228	0.379948	0.351843	0.365304	0.361438	0.360757	0.371514	0.367688	0.340425	0.372456	0.359776	0.378566	0.359956	0.362119	0.379788	0.380389	0.377143	0.398037	0.397015	0.407712	0.414143	0.398918	0.421595	0.428165	0.426923	0.419531	0.421615	0.475621	0.466627	0.4751	0.471955	0.469191	0.509014	0.492708	0.500621	0.499639	0.495413
ResNet50	ERM+AugMix Augm		0.292708	0.300681	0.325501	0.40615	0.38732	0.354627	0.343049	0.378946	0.413442	0.358053	0.354547	0.352564	0.358293	0.36262	0.347937	0.3624	0.339503	0.366386	0.348458	0.366306	0.357732	0.353345	0.364603	0.369812	0.37474	0.404527	0.390104	0.401262	0.396675	0.404868	0.434916	0.412119	0.428786	0.409696	0.412901	0.469792	0.490405	0.476502	0.477043	0.475521	0.500521	0.50026	0.504567	0.501783	0.505529
ResNet50	ERM+RandAugment Augm		0.298678	0.328746	0.299219	0.398818	0.396214	0.385317	0.353225	0.366907	0.399499	0.3628	0.34345	0.342648	0.352965	0.376242	0.372135	0.353345	0.339623	0.367849	0.352444	0.377063	0.370252	0.357572	0.366446	0.383033	0.374439	0.404968	0.398898	0.400421	0.399018	0.402444	0.425861	0.423898	0.423478	0.420533	0.427524	0.478466	0.471715	0.473618	0.483554	0.470954	0.501823	0.495192	0.496114	0.500361	0.502764
ResNet50	ERM+AutoAugment Augm		0.31248	0.321915	0.309095	0.406791	0.389704	0.354387	0.369992	0.365144	0.396575	0.356691	0.334515	0.33119	0.347897	0.387881	0.348678	0.361959	0.338241	0.37498	0.352784	0.369431	0.373918	0.351903	0.378906	0.38103	0.367548	0.419912	0.401923	0.420954	0.396154	0.410757	0.439123	0.434135	0.434195	0.428766	0.442248	0.474259	0.488221	0.490024	0.477524	0.478966	0.508814	0.502945	0.510697	0.511378	0.510737
ResNet50	IRM		0.359275	0.352204	0.360517	0.41855	0.410156	0.400921	0.377845	0.400761	0.414804	0.39403	0.380609	0.369111	0.415084	0.387059	0.385717	0.395252	0.377143	0.414263	0.399038	0.403145	0.404026	0.39982	0.421995	0.41254	0.41238	0.435156	0.434976	0.440425	0.433994	0.435176	0.455389	0.460797	0.459415	0.457993	0.45633	0.516066	0.512059	0.512941	0.51276	0.5123	0.546214	0.54357	0.541747	0.54373	0.544892
ResNet50	MixUp		0.342248	0.287019	0.298357	0.414824	0.400541	0.392548	0.371334	0.385537	0.406751	0.388241	0.363962	0.342147	0.406571	0.358654	0.376262	0.38774	0.346274	0.399659	0.378806	0.390064	0.396474	0.388101	0.412961	0.396875	0.394852	0.429507	0.422776	0.439844	0.431851	0.426983	0.453626	0.453806	0.455869	0.44978	0.450821	0.512059	0.508093	0.513281	0.509716	0.508694	0.543249	0.541086	0.539563	0.54345	0.541767
ResNet18	SagNet		0.32528	0.338902	0.341707	0.372456	0.358554	0.353626	0.358393	0.342348	0.361759	0.369291	0.352985	0.354507	0.362861	0.341707	0.349159	0.363462	0.341827	0.373798	0.378365	0.375881	0.367909	0.375821	0.385296	0.373077	0.38095	0.40617	0.410517	0.409776	0.417268	0.413482	0.435136	0.435256	0.442067	0.43145	0.443229	0.471795	0.472496	0.471414	0.47486	0.471294	0.477143	0.476803	0.469291	0.477524	0.485998
ResNet50	DANN		0.319932	0.335276	0.275661	0.417468	0.421575	0.415905	0.41268	0.42476	0.41877	0.410597	0.396575	0.384696	0.416066	0.405929	0.400621	0.397256	0.388862	0.410116	0.404227	0.417608	0.419491	0.412179	0.419411	0.421575	0.413842	0.434856	0.435637	0.441366	0.436018	0.433353	0.44986	0.453986	0.458894	0.453425	0.453425	0.513361	0.51236	0.513261	0.514984	0.514143	0.54361	0.542528	0.541867	0.544391	0.543009
ResNet50	BN-Adapt		0.336599	0.304247	0.272957	0.416707	0.396534	0.391486	0.364263	0.378165	0.402804	0.377564	0.364704	0.34986	0.401482	0.359876	0.365905	0.394191	0.372997	0.403626	0.363381	0.390505	0.400741	0.392849	0.414543	0.39381	0.385116	0.427103	0.438341	0.432332	0.426362	0.434235	0.446554	0.456831	0.455769	0.453686	0.451963	0.510697	0.510136	0.510717	0.511579	0.513201	0.542047	0.541667	0.538862	0.542488	0.541086
ResNet50	JTT		0.303606	0.28097	0.301242	0.419852	0.413141	0.385637	0.360577	0.379327	0.406691	0.385176	0.360577	0.355268	0.404868	0.366887	0.370152	0.385637	0.351983	0.398478	0.364343	0.396755	0.402624	0.395513	0.416206	0.401883	0.386939	0.429808	0.426683	0.435236	0.429327	0.428586	0.44972	0.45613	0.454968	0.45024	0.444191	0.512841	0.510497	0.511699	0.511258	0.508474	0.542107	0.542007	0.540825	0.542849	0.541026
ResNet50	CycleGAN		0.299579	0.372596	0.279788	0.409836	0.41254	0.369111	0.366066	0.360296	0.400561	0.377865	0.321615	0.350881	0.339143	0.362039	0.352845	0.363802	0.335296	0.377825	0.380228	0.380569	0.391587	0.36258	0.392268	0.384135	0.385777	0.425641	0.424639	0.426222	0.426542	0.430208	0.444391	0.44405	0.444091	0.447556	0.44377	0.50615	0.503566	0.502504	0.502103	0.498578	0.534655	0.530809	0.526803	0.532192	0.528385
ResNet50	B-VAE		0.335276	0.331671	0.276963	0.342808	0.329567	0.302825	0.274619	0.272216	0.30625	0.31258	0.255349	0.255789	0.298337	0.303125	0.253806	0.297977	0.279988	0.342808	0.307692	0.312861	0.31861	0.301983	0.327244	0.341546	0.333954	0.376703	0.402224	0.39401	0.403746	0.38758	0.404888	0.439183	0.435597	0.414363	0.431831	0.474619	0.485036	0.491607	0.491286	0.483774	0.49357	0.515304	0.510337	0.511799	0.51248
ResNet50	PreTrained on ImageNet		0.289623	0.311619	0.29982	0.419712	0.408073	0.370913	0.361999	0.355028	0.400681	0.37476	0.342949	0.349219	0.376623	0.353145	0.346134	0.367648	0.353786	0.377344	0.381831	0.373738	0.382792	0.396695	0.388902	0.397817	0.384575	0.461558	0.445773	0.458594	0.455709	0.446675	0.478065	0.4749	0.485737	0.48135	0.474519	0.544411	0.540905	0.542588	0.544191	0.54383	0.572476	0.56845	0.569531	0.571494	0.570533
